# Supplementary material
Source: publisher figshare collection journal article supplement (https://plos.figshare.com/articles/dataset/_/5600665)
Supplement: Supplementary file 14 [file 1]

# drLumi: multiplex immunoassays data analysis

Héctor Sanz<sup>1</sup>, John Aponte<sup>1</sup>, Jaroslaw Harezlak<sup>2</sup>,  
Yan Dong<sup>2</sup>, Magdalena Murawska<sup>2</sup> and Clarissa Valim<sup>3</sup>

September 23, 2015

<sup>1</sup>ISGlobal, Barcelona Ctr. Int. Health Res. (CRESIB), Hospital Clínic - Universitat de Barcelona, Barcelona, Spain

<sup>2</sup>Indiana University Fairbanks School of Public Health, Indianapolis, IN, USA

<sup>3</sup>Harvard School of Public Health, Boston, MA, USA

hector.sanz@isglobal.org

## Contents

|          |                                                       |           |
|----------|-------------------------------------------------------|-----------|
| <b>1</b> | <b>Introduction</b>                                   | <b>2</b>  |
| <b>2</b> | <b>Main structure of datasets</b>                     | <b>4</b>  |
| <b>3</b> | <b>Datasets in the package</b>                        | <b>4</b>  |
| 3.1      | MFI data . . . . .                                    | 4         |
| 3.2      | EC data . . . . .                                     | 4         |
| 3.3      | Raw data from xPONENT <sup>®</sup> software . . . . . | 5         |
| <b>4</b> | <b>Extraction of samples data</b>                     | <b>5</b>  |
| <b>5</b> | <b>Data analysis</b>                                  | <b>6</b>  |
| 5.1      | Models . . . . .                                      | 7         |
| 5.2      | Blank controls . . . . .                              | 8         |
| 5.3      | Limits of quantification . . . . .                    | 10        |
| 5.4      | Fitted concentration . . . . .                        | 13        |
| 5.5      | Agreement between controls . . . . .                  | 15        |
| <b>6</b> | <b>Summary of results</b>                             | <b>16</b> |
| <b>7</b> | <b>Flag data</b>                                      | <b>22</b> |
| <b>8</b> | <b>Raw data from xPONENT<sup>®</sup> software</b>     | <b>24</b> |
| 8.1      | MFI raw data . . . . .                                | 24        |
| 8.2      | Bead raw data . . . . .                               | 26        |

# 1 Introduction

The `drLumi` package allows users to manage data, calibrate assays and perform quality control of multiplex immunoassays. This document provides an overview on the usage of the main functions of the package and examples of the implemented methods. The datasets available in the package were used in the examples presented so they can be reproduced.

Multiplex immunoassays are used to measure concentrations of several cytokines and chemokines, antibodies, or other proteins simultaneously and are important for biomarkers discovery.

Several beads with antibodies fixed to capture the analyte of interest are mixed with subject's serum or plasma in 96 well plates, one subject per well. Sets of beads are individually labeled according to the specific analyte capability of measuring. After the beads capture the existing analyte in subject's sample, they are allowed to interact with a fluorescent antibody. In the presence of the analyte, the fluorescent antibody and the antibody fixed to the bead make a sandwich with the analyte to be quantified. This complex goes through laser bins that quantify the amount of analyte in each bead with the analyte-antibodies complex; the assay final raw output is the median fluorescence intensity (MFI) over all beads containing the corresponding analytes. To calibrate between-plate variability and quantify analyte concentrations, each plate includes wells containing increasing dilutions of a sample with known concentration of each analyte. Those wells are used to fit standard curves with the MFI as a function of the concentration of the analyte in the reference samples. To calibrate each subject's response, the MFI of the subject samples is converted in analyte concentration using the standard curve. The minimum and maximum concentration of analyte that can be reliably quantified after using the standard curve to transform the MFI in an analyte concentration is called lower and higher limit of quantification (LLOQ and HLOQ), respectively. Additionally, to estimate the background noise in the assay, samples containing no analyte (negative or blank controls) are included in each assay plate.

Several analytical factors when pre-processing the data from the assay may result in suboptimal calibration and decrease assay sensitivity, i.e., failure to quantify a large amount of samples because concentration is outside the limits of quantification (LOQ) range, including the fit of standard curve and the approach used to estimate limits of quantification. Moreover, the approach used to account for background noise when estimating standard curves can also affect the fitting of the standard curves and impact the assay calibration and sensitivity.

There are several commercial software to handle concentration-response multiplex data. Usually these software allow to estimate concentration of samples using a standard curve but they don't allow to perform a good Quality Control (QC) based on residuals, goodness of fit or confidence intervals for the coefficients.

In the following sections we illustrate how to perform all QC process for multiplex immunoassays data using `drLumi` package.

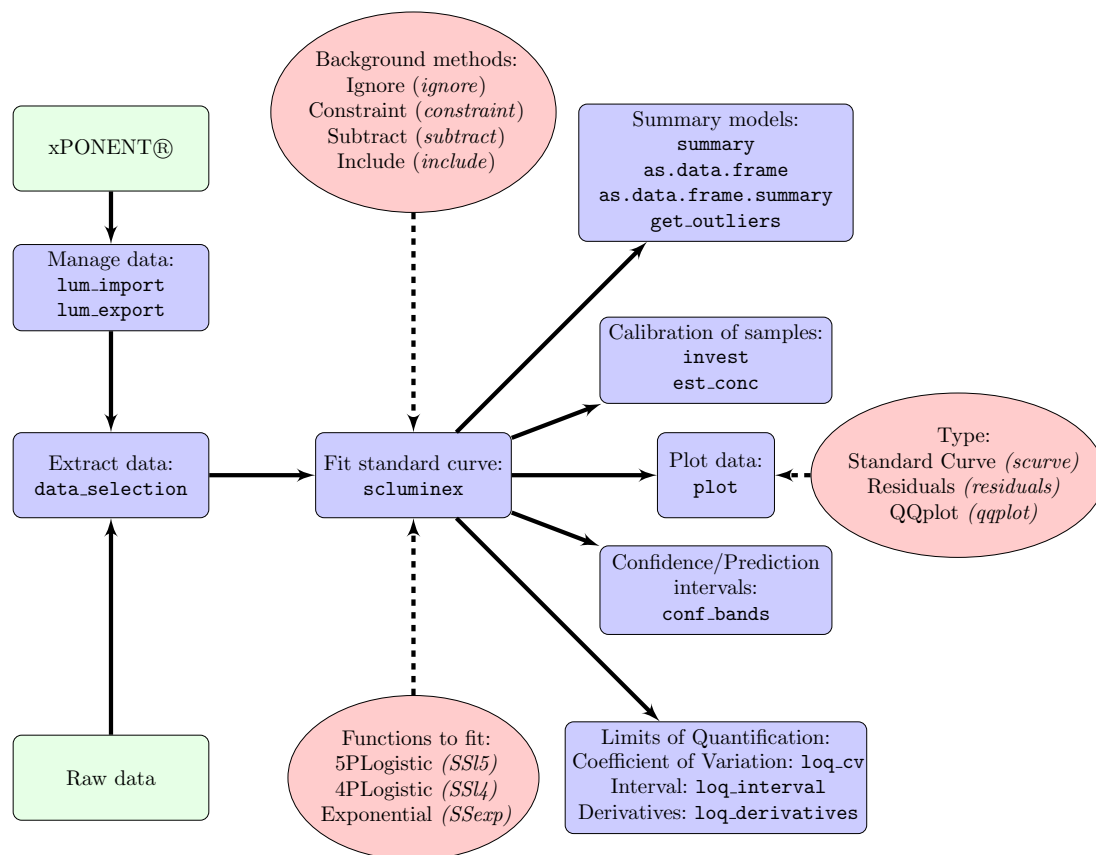

Figure 1: Schematic representation of the main functions and arguments included in the `drLumi` package. The name of the functions are shown inside blue boxes, options and name of arguments of the functions are shown inside red ellipses and the green box shows the starting point of the flow depending on the origin of the raw data.

The package allows to import CSV raw data that has been exported from `xPONENT®` software. For a detailed example showing how to process this type of data go to section 8.

To load the package:

```
> library(drLumi)
```

## 2 Main structure of datasets

The package only allows to read automatically CSV files from xPONENT<sup>®</sup> software. Other data must be pre-processed, if necessary, and transformed into a `data.frame` class object. The final `data.frame` must have the following variables:

- Plate identification.
- Well position.
- Analyte name.
- Sample identification.
- Median fluorescence intensity values.
- Expected concentration.

The information can be just in one `data.frame` or in several (e.g., `mfidata` and `ecdata`).

## 3 Datasets in the package

There are three datasets available in the `drLumi` package.

### 3.1 MFI data

A dataset with the median fluorescence intensity values for three 96-wells plates and 30 analytes information per plate. The variables included in the dataset are:

- `plate`: plate identification.
- `well`: position of the sample in the plate.
- `analyte`: analyte tested.
- `sample`: type of sample in the well (blank, standard, positive control or unknown). In each plate 2 blanks, 17 dilution points (standard 1 is duplicated), 3 controls (each one duplicated) were tested.
- `mfi`: Median Fluorescence Intensity.

To load the median fluorescence data:

```
> data(mfidata)
```

First 6 rows of the `mfidata`:

```
> head(mfidata)
  plate well analyte  sample  mfi
1 plate_1 P1_B1    FGF Control1 2902
2 plate_1 P1_A2    FGF Standard1 4096
3 plate_1 P1_B2    FGF Control2  440
4 plate_1 P1_A3    FGF Standard2 3925
5 plate_1 P1_B3    FGF Control3   40
6 plate_1 P1_A4    FGF Standard4 2510
```

### 3.2 EC data

A dataset with the expected concentration data by analyte for the `mfidata`. The variables included in the `data.frame` are:

- `sample`: type of sample (background, control or standard).

- analyte: analyte tested.
- ec: expected concentration value.

To load the expected concentration data:

```
> data(ecdata)
```

First 6 rows of the `ecdata`:

```
> head(ecdata)
  sample analyte      ec
1 Standard1    FGF 3450.0000
2 Standard2    FGF 1725.0000
3 Standard3    FGF  862.5000
4 Standard4    FGF  431.2500
5 Standard5    FGF  215.6250
6 Standard6    FGF  107.8125
```

### 3.3 Raw data from xPONENT<sup>®</sup> software

There is an example of CSV raw data from xPONENT<sup>®</sup> software in `inst/extdata` named `plate1.csv`. For a detailed example of this data go to section 8.

## 4 Extraction of samples data

Generally, the machine that reads the assay is connected to a software that produces a dataset including standard points, blank controls and subject's samples. The `data_selection` function allows splitting variables and samples in different datasets. Also, is possible to merge the expected concentration values and flag points (samples to be removed from the analysis, for instance outliers). Two available methods can be used in order to identify the samples:

- specify the *pattern* of the samples' name. The `data_selection` function using regular expressions will match samples based on the *pattern*.
- specify the exact name of the samples.

Extracting samples based on a *pattern* and merging the expected concentration variables:

```
> datasets <- data_selection(x = mfidata, ecfile = ecdata,
+   byvar.ecfile = c("sample","analyte"),
+   backname = "Background0",
+   stanname="Standard",posname = "Controls")
```

Where

- `x=mfidata`: is the MFI `data.frame`.
- `ecfile=ecdata`: is the expected concentration `data.frame` to be merged to `mfidata`.
- `byvar.ecfile = c("sample","analyte")`: are the link variables between the `mfidata` and `ecdata`.
- `backname = "Background0"`: is the pattern of the blank controls.
- `stanname = "Standard"`: is the pattern of the standard points.
- `posname = "Controls"`: is the pattern of the controls other than blank.

All samples datasets have been extracted (first 3 observations of each):

## Background

```
> head(datasets$plate_1$background,3)
  sample analyte  plate  well  mfi  ec
1 Background0   FGF plate_1 P1_A1 21.0 0
2 Background0   FGF plate_1 P1_H12 19.0 0
3 Background0  IL1B plate_1 P1_A1 20.5 0
```

## Standard

```
> head(datasets$plate_1$standard,3)
  sample analyte  plate  well  mfi  ec
1 Standard1   FGF plate_1 P1_H4 3933 3450
2 Standard1   FGF plate_1 P1_A2 4096 3450
3 Standard2   FGF plate_1 P1_A3 3925 1725
```

## Positive controls

```
> head(datasets$plate_1$positive,3)
  sample analyte  plate  well  mfi  ec
1 Control1   FGF plate_1 P1_B1 2902.0 1150.00
2 Control1   FGF plate_1 P1_G10 3173.5 1150.00
3 Control2   FGF plate_1 P1_B2 440.0 143.75
```

## Unknowns

```
> head(datasets$plate_1$unknowns,3)
  sample analyte  plate  well  mfi  ec
1 M_sid_8_DMSO  IL10 plate_1 P1_F10 521 NA
2 B_sid_13_CSP  FGF plate_1 P1_C1 18 NA
3 B_sid_13_DMSO  FGF plate_1 P1_D1 19 NA
```

## 5 Data analysis

The function used to analyze the data is `scluminex`. Given standard and background (optional) datasets, a list of nonlinear models and a background method this function tries to fit the list of models hierarchically. The package has some pre-specified models. The models are fitted by the `nlsLM` function from the `minpack.lm` [2] package which is a modified version of the `nls` function that incorporates the Levenberg-Marquardt algorithm. The `scluminex` function transforms the original data into base 10 logarithm.

```
> allanalytes <- scluminex(plateid = "newplate",
+   standard = datasets$plate_1$standard,
+   background = datasets$plate_1$background,
+   bkg = "ignore", lfct = c("SS15","SS14"),
+   fmfi = "mfi", verbose = FALSE)
```

where,

- `plateid`: is the name of the plate (or experiment).
- `standard = datasets$plate_1$standard`: is a `data.frame` with the standard points information.
- `background = datasets$plate_1$background`: is a `data.frame` with the blank controls data.
- `bkg = "ignore"`: is the approach to account for the background noise.
- `lfct = c("SS15", "SS14")`: are the models to be fitted. The function will try to estimate in first place the SS15 model and if the model does not converge will try to fit SS14.
- `fmfi = "mfi"`: is the name of the MFI variable.
- `verbose = FALSE`: logical to do not print the convergence of the models.

Note that the class of `allanalytes` is `scluminex`. The `list` syntax can be used to extract the information of one specific analyte:

```
> class(allanalytes)
[1] "scluminex"
> allanalytes
 [1] "FGF"      "IL1B"      "G-CSF"      "IL10"      "IL13"      "IL6"      "IL12"
 [8] "RANTES"   "EOTAXIN"   "IL17"      "MIP1A"     "GMCSF"     "MIP1B"     "MCP1"
[15] "IL15"     "EGF"       "IL5"       "HGF"       "VEGF"      "IFNg"      "IFNa"
[22] "IL1RA"    "TNFa"      "IL2"       "IL7"       "IP10"      "IL2R"      "MIG"
[29] "IL4"      "IL8"
> names(allanalytes$FGF)
 [1] "convergence" "data"      "model"      "coefficients" "rsquare"
 [6] "aic"          "modelfit"  "neill.method" "flag_data"    "fct"
[11] "bkg_mean"    "alertbkg"  "bkg_method"  "fieldnames"
```

## 5.1 Models

As described previously, the package has implemented some nonlinear `selfStart` models:

**Five-parameter logistic function:** using a base 10 logarithm is implemented though the SS15 function:

$$f(x; b, c, d, e, f) = c + \frac{d - c}{(1 + 10^{b(x-e)})^f}$$

where,

- $b$ : the slope around  $e$  parameter
- $c$ : the lower asymptote parameter
- $d$ : the upper asymptote parameter
- $e$ : the concentration that produces a response halfway between  $c$  and  $d$ .
- $f$ : the asymmetry for the slope

The constraint version has  $c$  as a fixed value instead a parameter.

**Four-parameter logistic function:** is expressed as a particular version of the five-parameter logistic model when the  $f$  parameter is fixed to 1:

$$f(x; b, c, d, e) = c + \frac{d - c}{1 + 10^{b(x-e)}}$$

The SS14 function has the `selfStart` model implemented also on base 10 logarithm. As the SS15, the constraint method has the parameter  $c$  as a fixed value.

**Exponential growth:** the `SSexp` function has the `selfStart` exponential model implemented on base 10 logarithm:

$$f(x; y_0, b) = y_0 10^{\frac{x}{b}}$$

where,

- $b$ : the growth rate
- $y_0$ : the response when there is no concentration.

The constraint version of this function has  $y_0$  as a fixed value instead a parameter.

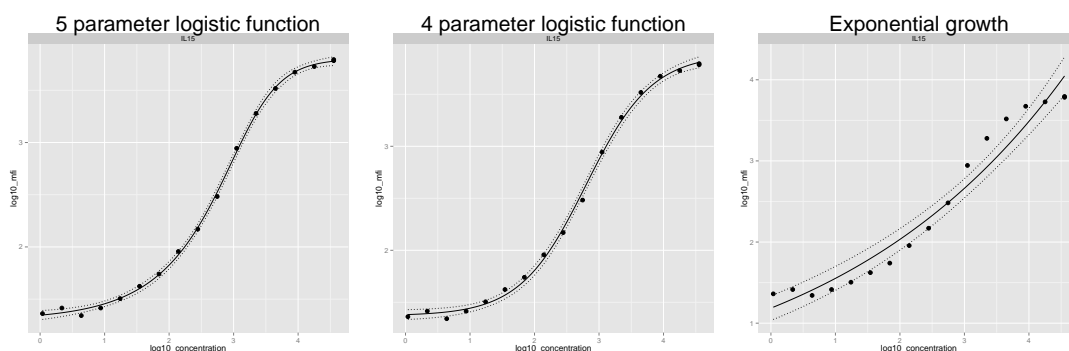

Figure 2: Comparison of five-parameter, four-parameter and exponential models for plate 1 (IL15 analyte) with ignored background.

## 5.2 Blank controls

The `scluminex` functions allows to specify 4 methods to handle blank controls. As an example, first we subset information from one analyte and then we add the expected concentration data:

```
> fgf <- subset(mfidata, analyte=="FGF" & plate=="plate_1")
> dat <- data_selection(fgf, ecdata)
```

**Ignored:** the background information can be ignored, so the estimation of the coefficients will not take into account any background data.

```
> ig <- scluminex("plate_1", dat$plate_1$standard, dat$plate_1$background,
+               lfct="SS14", bkg="ignore", fmfi="mfi", fanalyte="analyte",
+               verbose=FALSE)
```

**Included:** the estimation of the standard curve takes into account the mean of the background of the values as another point of the standard curve. The median fluorescence intensity and the expected concentration for this new point by analyte is estimated as follows:

- MFI: geometric mean value of the blank controls.
- EC: the minimum expected concentration value of the standard points divided by 2.



```

> inc <- scluminex("plate_1",dat$plate_1$standard, dat$plate_1$background,
+                 lfct="SS14", bkg="include", fmfi="mfi", fanalyte="analyte",
+                 verbose=FALSE)

```

**Subtracted:** the geometric mean of the blank controls is subtracted from all the standard points.

```

> sub <- scluminex("plate_1",dat$plate_1$standard, dat$plate_1$background,
+                 lfct="SS14", bkg="subtract", fmfi="mfi", fanalyte="analyte",
+                 verbose=FALSE)

```

**Constrained:** the constrained parameter (lower asymptote) is fixed to the geometric mean background value and  $p - 1$  parameters are estimated from the original model.

```

> cons <- scluminex("plate_1", dat$plate_1$standard, dat$plate_1$background,
+                  lfct="SS14", bkg="constraint", fmfi="mfi", fanalyte="analyte",
+                  verbose=FALSE)

```

Figure 3 shows the comparison of the 4 methods.

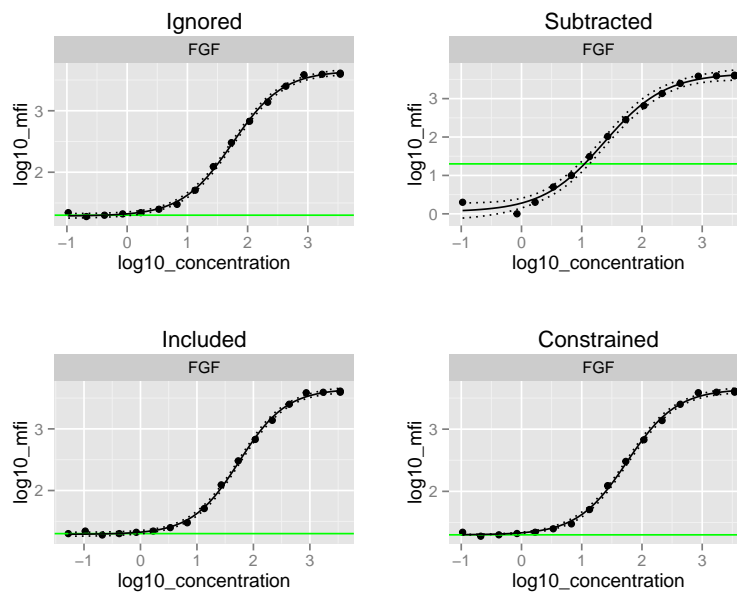

Figure 3: Comparison of background methods for plate 1 (FGF analyte) and 4 parameters logistic model. Green line shows the geometric mean of the blank controls.

### 5.3 Limits of quantification

The package implements 3 types of estimation for the upper and lower limit of quantification.

**Derivatives:** the estimation is based on the second order derivative of the model [9]. Once is estimated the maximum and minimum values are found (finding the roots on the third derivative) and those are the limits of quantification (Figure 4). The package calculates the exact derivatives functions for the SS15, SS14 and SSexp. Given an `scluminex` object the `loq_derivatives` function estimates the LOQ for all analytes or the specified ones by the `subset.list` argument.

```
> # arguments of the function
> args(loq_derivatives)
function (x, subset.list = NULL, ...)
NULL
```

```
> der <- loq_derivatives(allanalytes, subset.list="FGF")
> der
  analyte    lloq    uloq  method
1     FGF 1.088223 2.250466 derivative
```

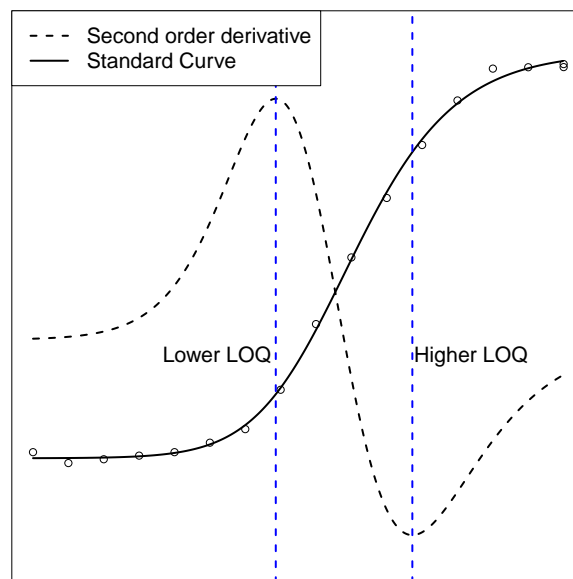

Figure 4: Representation of the limits of quantification based on derivatives.

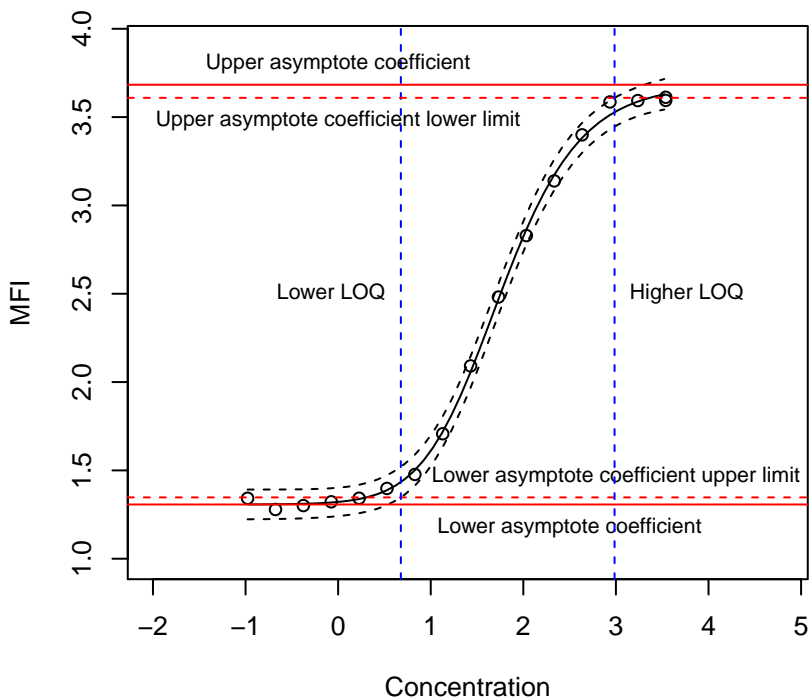

Figure 5: Estimation of limits of quantification based on interval method for plate 1, FGF analyte and ignored background

**Interval:** the `loq_interval` function estimates the LOQ based on the prediction interval of the curve and the coefficients of the model [7]:

- Lower limit of quantification: is the concentration value of the intersection between lower prediction interval of the standard curve and the upper interval for the lower asymptote coefficient estimated by the model (if the model allows).
- Upper limit of quantification: is the concentration value of the intersection between upper prediction interval of the standard curve and the lower interval for the upper asymptote coefficient estimated by the model (if the model allows).

The function needs as an argument, the model and the position or name of the asymptote coefficients. In Figure 5 there is an example for the plate 1, FGF analyte with ignored background.

```
> int <- loq_interval(allanalytes, subset.list= "FGF", low.asymp=2, high.asymp=3)
> int
  analyte    lloq    uloq  method
1    FGF 0.677414 2.985435 interval
```

In the scenario where one of the asymptotes must be specified and not based in the coefficients, the arguments `lowci` or `highci` must be changed into the desired value. For example, in Figure 6 the upper LOQ is estimated based on coefficients (same values as estimated in Figure 5) but the lower asymptote has been fixed to 1.5 (not based on the coefficients estimation). Therefore, the intersection of the lower asymptote with the prediction interval is different and consequently the estimation of the concentration:

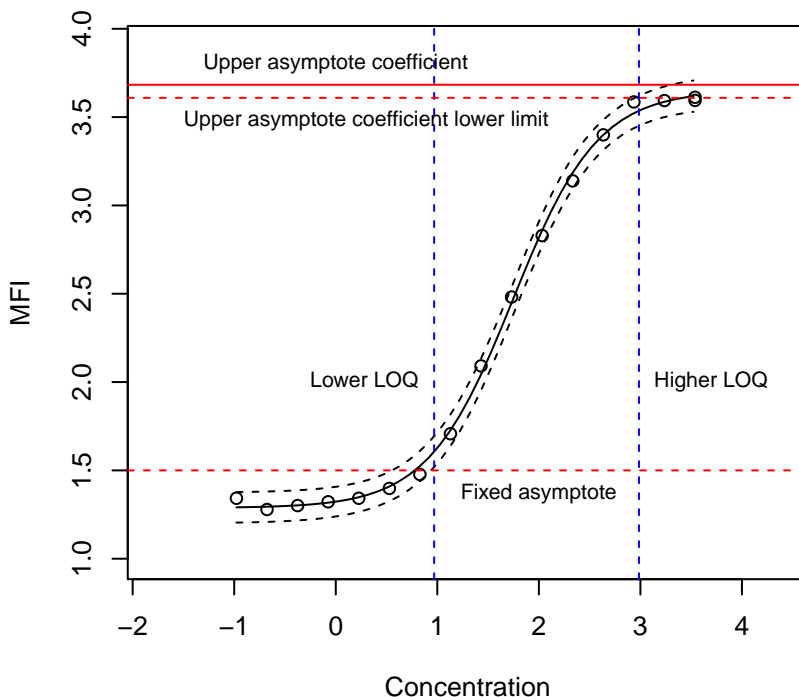

Figure 6: Estimation of limits of quantification based on interval method (fixed lower asymptote value) for plate 1, FGF analyte and ignored background.

```
> int2 <- loq_interval(allanalytes, subset.list="FGF", high.asymp=3, lowci=1.5)
> int2
  analyte    lloq    uloq  method
1    FGF 0.9690558 2.985435 interval
```

**Coefficient of variation:** this method is based on the estimation of the coefficient of variation of the fitted concentration values (base 10 logarithm) [1, 4]. The function calls the `invest` function and estimates the fitted concentration given a MFI, the standard error is estimated using the Delta Method. The Coefficient of Variation for the fitted concentration is estimated as:

$$\sqrt{e^{(SE \times \ln(10))^2} - 1}$$

where  $SE$  is the standard error of the fitted concentration [8].

For a specific coefficient of variation cutoff the LLOQ and HLOQ are calculated as the fitted concentration values whose coefficient of variation is lower or equal to the specified cutoff.

Given a `scluminex` object and a coefficient of variation cutoff (`max.cv` argument), the `loq.cv` function estimates the LOQ. See Figure 7 for a representation of it.

```
> cv <- loq_cv(allanalytes, subset.list="FGF", max.cv=0.2)
> cv
  analyte    lloq    uloq  method
1    FGF 0.4623362 3.127466 coefficient variation <=0.2
```

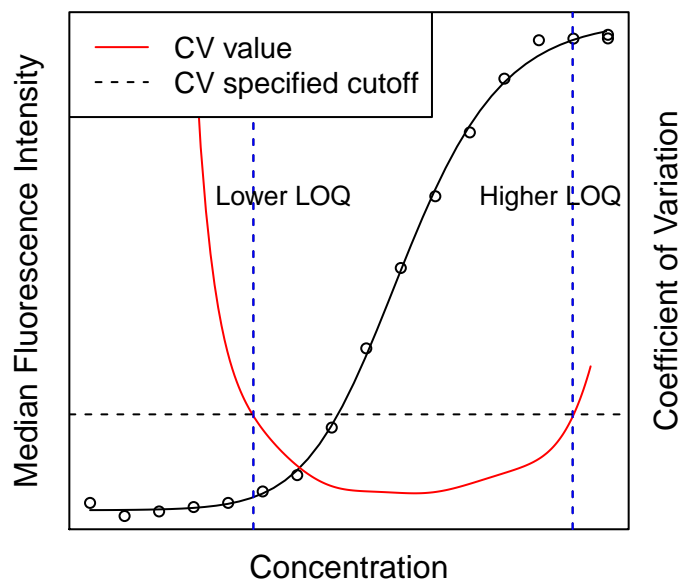

Figure 7: Estimation of limits of quantification based on coefficient of variation method.

The LOQ object is loq class:

```
> class(der)
[1] "loqderivatives" "loq"
```

the **summary** method can be applied to obtain more information.

```
> summary(der)
  analyte   lloq    uloq     ly     uy loq.drangle y.drangle   method
1      FGF 1.088223 2.250466 1.681452 3.097439  1.162243 1.415988 derivative
```

The new variables added are:

- **ly**: the MFI value of the LLOQ (lloq variable).
- **uy**: the MFI value of the ULOQ (uloq variable).
- **loq.drangle**: dynamic range of the LOQ (difference between uloq and lloq).
- **y.drangle**: dynamic range of the MFI values (difference between uy and ly).

## 5.4 Fitted concentration

Given a MFI value (base 10 logarithm), the function **invest** estimates the concentration value and the standard error calculating the invert value [11]. The package calculates the inverse functions for the 5-parameters, 4-parameters and exponential functions (in base 10 logarithm) therefore an analytical solution is given. The arguments of the function are:

```
> args(invest)
function (x, analyte = NULL, yvalue, ci.method = c("delta", "bootstrap"),
  level = 0.95, seed.boot = 123, nboot = 100)
NULL
```

Two methods for estimating the confidence interval are available:

**Bootstrap:** generates `nboot` response vectors (assuming normality) and fit the same initial model with the original concentration data. The confidence interval is calculated by the percentile method specified in the `level` argument. No standard error is estimated.

```
> invesboot <- invest(ig, "FGF", yvalue = 1.4, ci.method="bootstrap")
> invesboot
  log10_mfi log10_concentration.fit log10_concentration.lci
1      1.4          0.4949141          0.3766864
  log10_concentration.uci log10_concentration.se ci.method analyte
1          0.5770771          NA bootstrap      FGF
```

**Delta method:** estimates the standard error based on the Delta Method. The function used is `deltamethod` from the `msm` [5] package.

```
> invesdelta <- invest(ig, "FGF", yvalue = 1.4, ci.method="delta")
> invesdelta
  log10_mfi log10_concentration.fit log10_concentration.lci
1      1.4          0.4949141          0.383485
  log10_concentration.uci log10_concentration.se ci.method analyte
1          0.6063431          0.05157872      delta      FGF
```

Also is possible to take into account the dilution of the concentration calling the `est_conc` function. This function is a wrapper of the `invest` one but is specific for concentration estimation. Given a `scluminex` object and a dataset, the function estimates the concentration for each analyte with the corresponding estimated model.

As an example, to select the positive control dataset of the FGF analyte:

```
> concdf <- subset(datasets$plate_1$positive, analyte=="FGF")
```

Assuming dilution factor 1 (same results as `invest` function):

```
> est_conc(ig, concdf, fmfi="mfi", dilution=1)
  sample analyte  plate  well  mfi      ec warning log10.fitted.conc
1 Control1      FGF plate_1 P1_B1 2902.0 1150.0000
2 Control1      FGF plate_1 P1_G10 3173.5 1150.0000
3 Control2      FGF plate_1 P1_B2  440.0  143.7500
4 Control2      FGF plate_1 P1_G11  435.0  143.7500
5 Control3      FGF plate_1 P1_B3   40.0   21.2963
6 Control3      FGF plate_1 P1_G12   36.0   21.2963
  log10.fitted.conc.se dilution dil.fitted.conc dil.lb.conc dil.ub.conc
1      0.03614467      1      584.853627  488.608904  700.056348
2      0.04404870      1      742.141174  596.108199  923.948911
3      0.01475733      1       74.180727  68.930244  79.831144
4      0.01472403      1       73.571118  68.375109  79.161987
5      0.02747050      1        9.194423   8.020068  10.540734
6      0.02966791      1        7.738296   6.676544   8.968896
```

Assuming dilution factor 2:

```

> est_conc(ig, concdf, fmfi="mfi", dilution=2)
  sample analyte  plate  well  mfi      ec warning log10.fitted.conc
1 Control1     FGF plate_1 P1_B1 2902.0 1150.0000      2.7670472
2 Control1     FGF plate_1 P1_G10 3173.5 1150.0000      2.8704865
3 Control2     FGF plate_1 P1_B2  440.0  143.7500      1.8702911
4 Control2     FGF plate_1 P1_G11  435.0  143.7500      1.8667074
5 Control3     FGF plate_1 P1_B3   40.0   21.2963      0.9635245
6 Control3     FGF plate_1 P1_G12   36.0   21.2963      0.8886454
  log10.fitted.conc.se dilution dil.fitted.conc dil.lb.conc dil.ub.conc
1          0.03614467         2      1169.70725  977.21781 1400.11270
2          0.04404870         2      1484.28235 1192.21640 1847.89782
3          0.01475733         2       148.36145  137.86049  159.66229
4          0.01472403         2       147.14224  136.75022  158.32397
5          0.02747050         2        18.38885   16.04014   21.08147
6          0.02966791         2        15.47659   13.35309   17.93779

```

## 5.5 Agreement between controls

The function `intra_icc` estimates the intraclass correlation coefficient for a dataset in long format. The function calls the `icc` function from the `irr` [3] package.

Taking as example the concentration data for the positive controls:

```

> conc_icc_df <- est_conc(allanalytes, datasets$plate_1$positive,
+   fmfi="mfi", dilution=1)

```

The data has the following structure (6 first rows):

```

> head(conc_icc_df)
  sample analyte  plate  well  mfi      ec warning log10.fitted.conc
1 Control1     FGF plate_1 P1_B1 2902.0 1150.0000      2.8017672
2 Control1     FGF plate_1 P1_G10 3173.5 1150.0000      2.9039833
3 Control2     FGF plate_1 P1_B2  440.0  143.7500      1.8590243
4 Control2     FGF plate_1 P1_G11  435.0  143.7500      1.8553082
5 Control3     FGF plate_1 P1_B3   40.0   21.2963      0.9894147
6 Control3     FGF plate_1 P1_G12   36.0   21.2963      0.9231057
  log10.fitted.conc.se dilution dil.fitted.conc dil.lb.conc dil.ub.conc
1          0.03951173         1        633.529984  519.611216  772.424129
2          0.04442805         1        801.647207  641.479648 1001.806132
3          0.01525222         1         72.281029   66.956476   78.029004
4          0.01525136         1        71.665174   66.386276   77.363839
5          0.02835275         1         9.759211    8.465241   11.250972
6          0.03269666         1         8.377331    7.109937    9.870645

```

To estimate the ICC:

```

> icc_positive <- intra_icc(conc_icc_df, id.var=c("sample", "analyte", "plate"),
+   value.var="dil.fitted.conc", type="agreement", model="twoway",
+   unit="single")

```

where

- `id.var`: identifies the replicates samples
- `value.var`: the variable to be analyzed.
- others: arguments to be passed to the `icc` function from the `irr` package

There are three objects in the list generated:

### Re-Structured dataset

```
> head(icc_positive$icc.df)
  dil.fitted.conc_1 dil.fitted.conc_2 sample analyte plate
1      633.529984      801.647207 Control1    FGF plate_1
2       72.281029       71.665174 Control2    FGF plate_1
3       9.759211        8.377331 Control3    FGF plate_1
4     1209.316230     1272.055684 Control1    IL1B plate_1
5      167.309524      165.716522 Control2    IL1B plate_1
6       19.680236       21.636014 Control3    IL1B plate_1
```

### The ICC object from the irr package

```
> names(icc_positive$icc.mod)
 [1] "subjects"  "raters"    "model"     "type"      "unit"
 [6] "icc.name"  "value"     "r0"        "Fvalue"    "df1"
[11] "df2"       "p.value"   "conf.level" "lbound"    "ubound"
```

### The ICC estimation

```
> icc_positive$icc.value
 [1] 0.9871378
```

## 6 Summary of results

The `scluminex` object can be printed, summarized and plotted.

**Print:** the name of the analytes is listed.

```
> allanalytes
 [1] "FGF"      "IL1B"     "G-CSF"    "IL10"     "IL13"     "IL6"      "IL12"
 [8] "RANTES"   "EOTAXIN"  "IL17"     "MIP1A"    "GMCSF"    "MIP1B"    "MCP1"
[15] "IL15"     "EGF"      "IL5"      "HGF"      "VEGF"     "IFNg"     "IFNa"
[22] "IL1RA"    "TNFa"     "IL2"      "IL7"      "IP10"     "IL2R"     "MIG"
[29] "IL4"      "IL8"
```

**Summary:** a dataset is generated showing the estimated coefficients, number of observations,  $R^2$ , convergence and the fitted function for each analyte. To extract more information `as.data.frame` can be applied to a `summary.scluminex` object or to a `scluminex`. The methodology applied:

**Neill test:** is an ANOVA-based lack-of-fit test [6]. The method does not require replicates for concentration values but assumes that predictor variable can be grouped. The function is an adaptation of the `neill.test` from `drc` package [10]. The p-value of the test is reported.



$R^2$ : is the adjusted version of  $R^2$  which takes into account the number of fitted parameters, estimated as:

$$\left(1 - \frac{\frac{SS_{err}}{(n-p-1)}}{\frac{SS_{tot}}{(n-1)}}\right)$$

where,

- $n$ : number of observations
- $p$ : number of estimated coefficients
- $SS_{err}$ : residual sum of squares
- $SS_{tot}$ : total sum of squares

**AIC**: Akaike information criterion estimated as:

$$(-2 \times (\log - likelihood) + 2 \times p)$$

where  $p$  is the number of estimated parameters in the model. The function applied to the fitted model is the generic **AIC** function for **nls** class object.

As example, the **summary** method applied to a **scluminex** object

```
> summary(allanalytes)
  analyte      b          c          d          e          f obs  rsquare convergence  fct
1      FGF -0.8828771  1.3068483  3.683054  1.3890770  1.7678441  17  0.9986956 convergence SS15
2      IL1B -0.7291501  1.2823197  4.157377  2.2406824  1.1845345  17  0.9997494 convergence SS15
3      G-CSF -0.7229726  0.7586540  4.092740  2.6835136  1.2948285  17  0.9994358 convergence SS15
4      IL10 -0.4523784  0.6016439  4.595441  1.9790133  0.9125607  17  0.9994614 convergence SS15
5      IL13 -0.8043012  0.8938679  4.283454  1.9005612  1.6165574  17  0.9996548 convergence SS15
6      IL6  -0.6209108  0.9814027  4.348758  1.9220673  0.7637184  17  0.9992782 convergence SS15
7      IL12 -0.6862771  0.8229139  4.204463  2.2984784  1.3830266  17  0.9998644 convergence SS15
8      RANTES -0.9437332  1.7723069  3.918469  1.6347323  1.7387868  17  0.9994649 convergence SS15
9      EOTAXIN -0.5210368  1.4316138  4.289606  0.8253446  2.1946897  17  0.9997680 convergence SS15
10     IL17  -0.7770365  0.8729686  4.437082  2.6606798  0.5119282  17  0.9996918 convergence SS15
11     MIP1A -0.7290696  0.9101793  3.990784  1.5526541  1.9647135  17  0.9998835 convergence SS15
12     GMCSF -0.4091215  0.3682323  4.531576  1.2278351          NA  17  0.9991905 convergence SS14
13     MIP1B -0.5502088  1.0419523  4.381991  2.0851423  1.5433827  17  0.9997014 convergence SS15
14     MCP1  -0.6368871  1.0210596  4.558936  2.2773092  1.4159834  17  0.9998101 convergence SS15
15     IL15 -1.2741555  1.3014988  3.801743  3.2553293  0.4213175  17  0.9989005 convergence SS15
16     EGF  -0.7775902  1.4265917  4.247292  1.9743882  0.7942679  17  0.9999056 convergence SS15
17     IL5  -0.7358589 -0.1865238  4.482711  2.5280240  0.2742499  17  0.9994644 convergence SS15
18     HGF  -0.4779733  0.8688056  5.138004  2.5832461  2.0644387  17  0.9996647 convergence SS15
19     VEGF -0.8248516  1.5726924  3.950033  1.6801506  1.0039745  17  0.9997100 convergence SS15
20     IFNg -0.4707418  0.6146812  4.754997  2.3781928          NA  17  0.9992237 convergence SS14
21     IFNa -0.9684408  0.7668357  4.234176  2.2819768  0.9519239  17  0.9993487 convergence SS15
22     IL1RA -0.6535843  1.6186756  3.973113  3.1939268          NA  17  0.9977053 convergence SS14
23     TNFa  -0.3705635  0.7370135  4.773413  0.9077849  2.1495834  17  0.9994428 convergence SS15
24     IL2  -0.6672199  0.9780458  4.410199  2.3856437  0.7218382  17  0.9998813 convergence SS15
25     IL7  -0.8784672  1.5961995  4.267243  2.4553340  1.1748884  17  0.9997071 convergence SS15
26     IP10 -0.7080650  0.7865411  4.353835  0.9641264  1.5094283  17  0.9996376 convergence SS15
27     IL2R -0.5859247  0.9110713  4.285251  2.7511816  1.2448516  17  0.9996893 convergence SS15
28     MIG  -0.6499398  0.8284273  4.598374  1.9951056  1.8461333  17  0.9996634 convergence SS15
29     IL4  -0.5490025  0.8743643  4.339536  2.1432739  1.3927581  17  0.9998933 convergence SS15
30     IL8  -0.6469705  1.7275331  4.135944  2.0599591  1.4727478  17  0.9996691 convergence SS15
```

the `as.data.frame` method to a `scluminex` object

```
> as.data.frame(ig)
  analyte      mfi          ec      well log10_mfi log10_concentration
1      FGF 4096.0 3450.0000000 P1_A2  3.612360          3.53781910
2      FGF 3933.0 3450.0000000 P1_H4  3.594724          3.53781910
3      FGF 3925.0 1725.0000000 P1_A3  3.593840          3.23678910
4      FGF 2510.0  431.2500000 P1_A4  3.399674          2.63472911
5      FGF  675.0 107.8125000 P1_A5  2.829304          2.03266912
6      FGF 3854.0 862.5000000 P1_H5  3.585912          2.93575910
7      FGF  123.5  26.9531250 P1_A6  2.091667          1.43060913
8      FGF 1377.0 215.6250000 P1_H6  3.138934          2.33369911
9      FGF   30.0   6.7382812 P1_A7  1.477121          0.82854913
10     FGF  303.0  53.9062500 P1_H7  2.481443          1.73163912
11     FGF   22.0   1.6845703 P1_A8  1.342423          0.22648914
12     FGF   51.0  13.4765625 P1_H8  1.707570          1.12957913
13     FGF   20.0   0.4211426 P1_A9  1.301030         -0.37557085
14     FGF   25.0   3.3691406 P1_H9  1.397940          0.52751914
15     FGF   22.0   0.1052856 P1_A10 1.342423         -0.97763084
16     FGF   21.0   0.8422852 P1_H10 1.322219         -0.07454085
17     FGF   19.0   0.2105713 P1_H11 1.278754         -0.67660084

      warning predicted.log10_mfi      residuals
1                               3.619779 -0.204908310
2                               3.619779 -0.691997531
3                               3.586877  0.192313387
4                               3.399745 -0.001967785
5                               2.859326 -0.829174292
6                               3.522083  1.762897543
7                               2.042835  1.348683934
8                               3.186101 -1.302704181
9                               1.523880 -1.291419811
10                              2.448572  0.907867003
11                              1.347986 -0.153657570
12                              1.727064 -0.538396036
13                              1.302009 -0.027032456
14                              1.408672 -0.296396611
15                              1.290855  1.424237036
16                              1.317258  0.137038697
17 Not_Estimated_Concentration 1.294517 -0.435383042

  log10.fitted.conc log10.fitted.conc.se plateid
1      3.449503479          0.20302133 plate_1
2      3.292007536          0.13140535 plate_1
3      3.285427496          0.12902475 plate_1
4      2.634596941          0.02984423 plate_1
5      2.009076031          0.01649710 plate_1
6      3.230453096          0.11075190 plate_1
7      1.469657477          0.01615612 plate_1
8      2.282880986          0.02131608 plate_1
9      0.727426969          0.03567570 plate_1
10     1.754876098          0.01406998 plate_1
11     0.185252694          0.10496266 plate_1
12     1.106420774          0.02375991 plate_1
13     -0.404669644          0.48753881 plate_1
14     0.486818796          0.05239479 plate_1
15     0.185252694          0.10496266 plate_1
16     -0.009466399          0.17418522 plate_1
17              NaN              NaN plate_1
```

and `as.data.frame` to a `summary.scluminex` method:

```

> ss <- summary(ig)
> as.data.frame(ss)
  analyte      b      c      d      e      b_se      c_se      d_se
1   FGF -1.039396 1.287375 3.651836 1.746509 0.04389603 0.01758703 0.02389215
  e_se      b_t      c_t      d_t      e_t      b_pval      c_pval
1 0.01906806 -23.67858 73.20025 152.8467 91.59341 4.469256e-12 2.148862e-18
  d_pval      e_pval obs  rsquare modelfit      aic convergence plateid
1 1.51517e-22 1.172038e-19 17 0.9985489 0.299 -59.14575 convergence plate_1
  fct bkg_mean bkg_method
1 SS14 19.97498 ignore

```

**Plot:** standard curves, standardized residuals or Q-Q plot of the residuals are plotted. The function is based on `ggplot2` so other data can be added to the plot. The plot is specified by the `type` argument.

The default type is `scurve` and the function allows to plot the standard curve of a plate for all analytes or just the ones desired. Also allows to plot some other aspects as legend, confidence bands, background or specify the number of columns.

```
> plot(allanalytes, type = "scurve", ncol=5, psize=1)
```

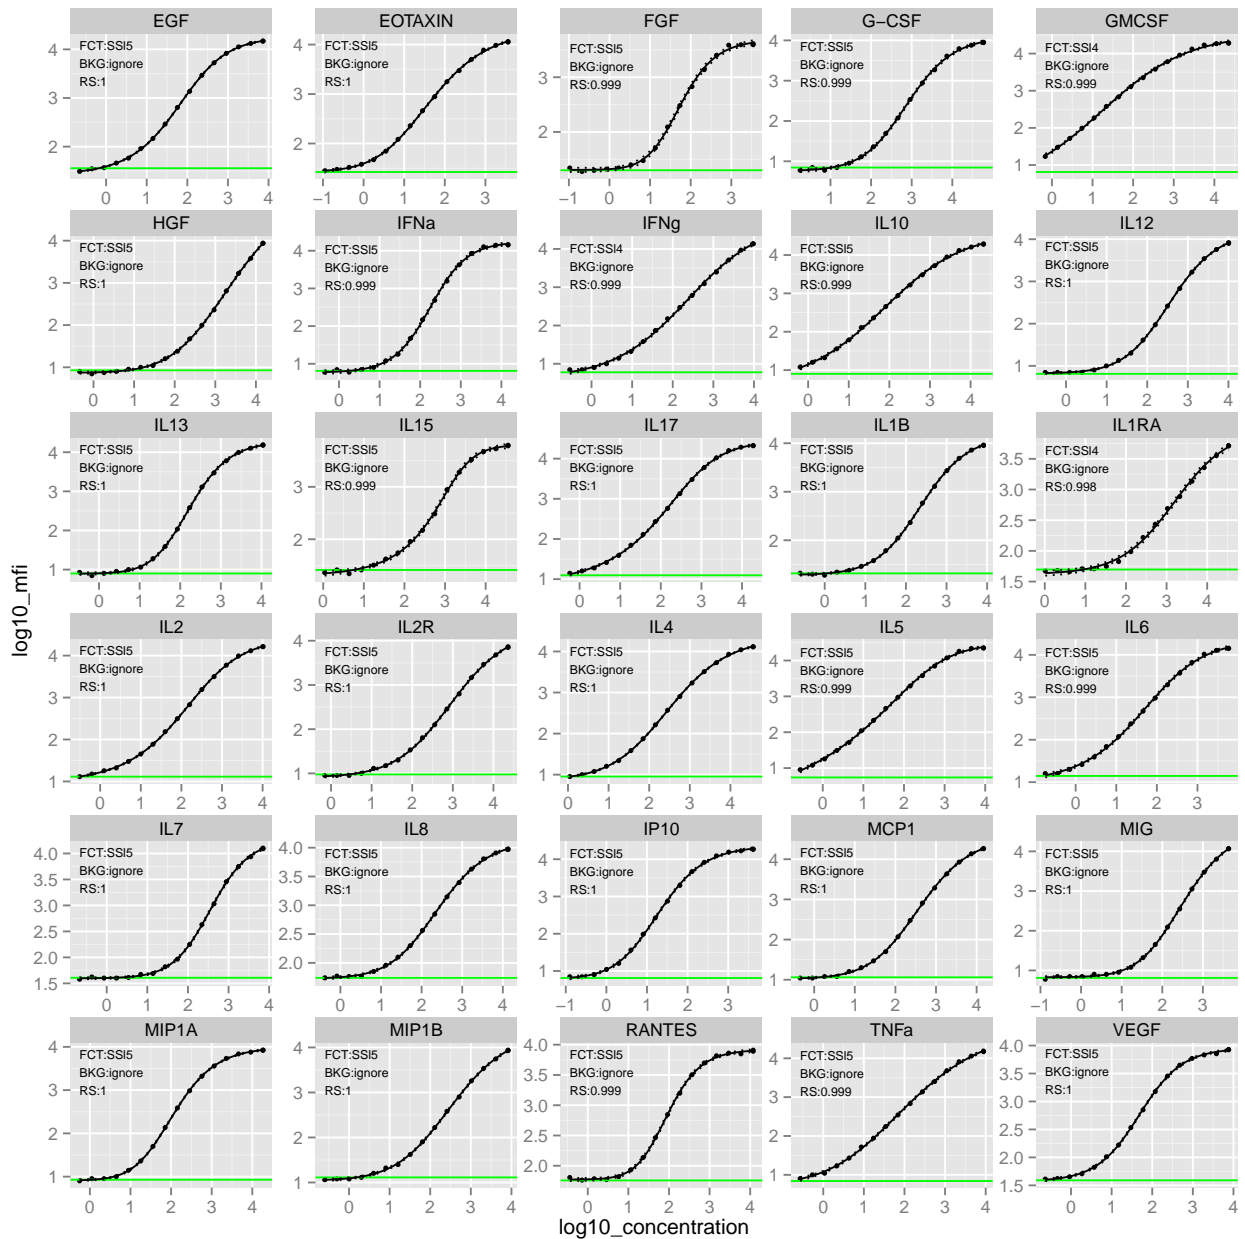

The type residuals show the standardized residuals. The points beyond the out.limit argument are presented in red and the well variable is shown.

```
> plot(allanalytes, type = "residuals", out.limit= 2.5, ncol=5, psize=1)
```

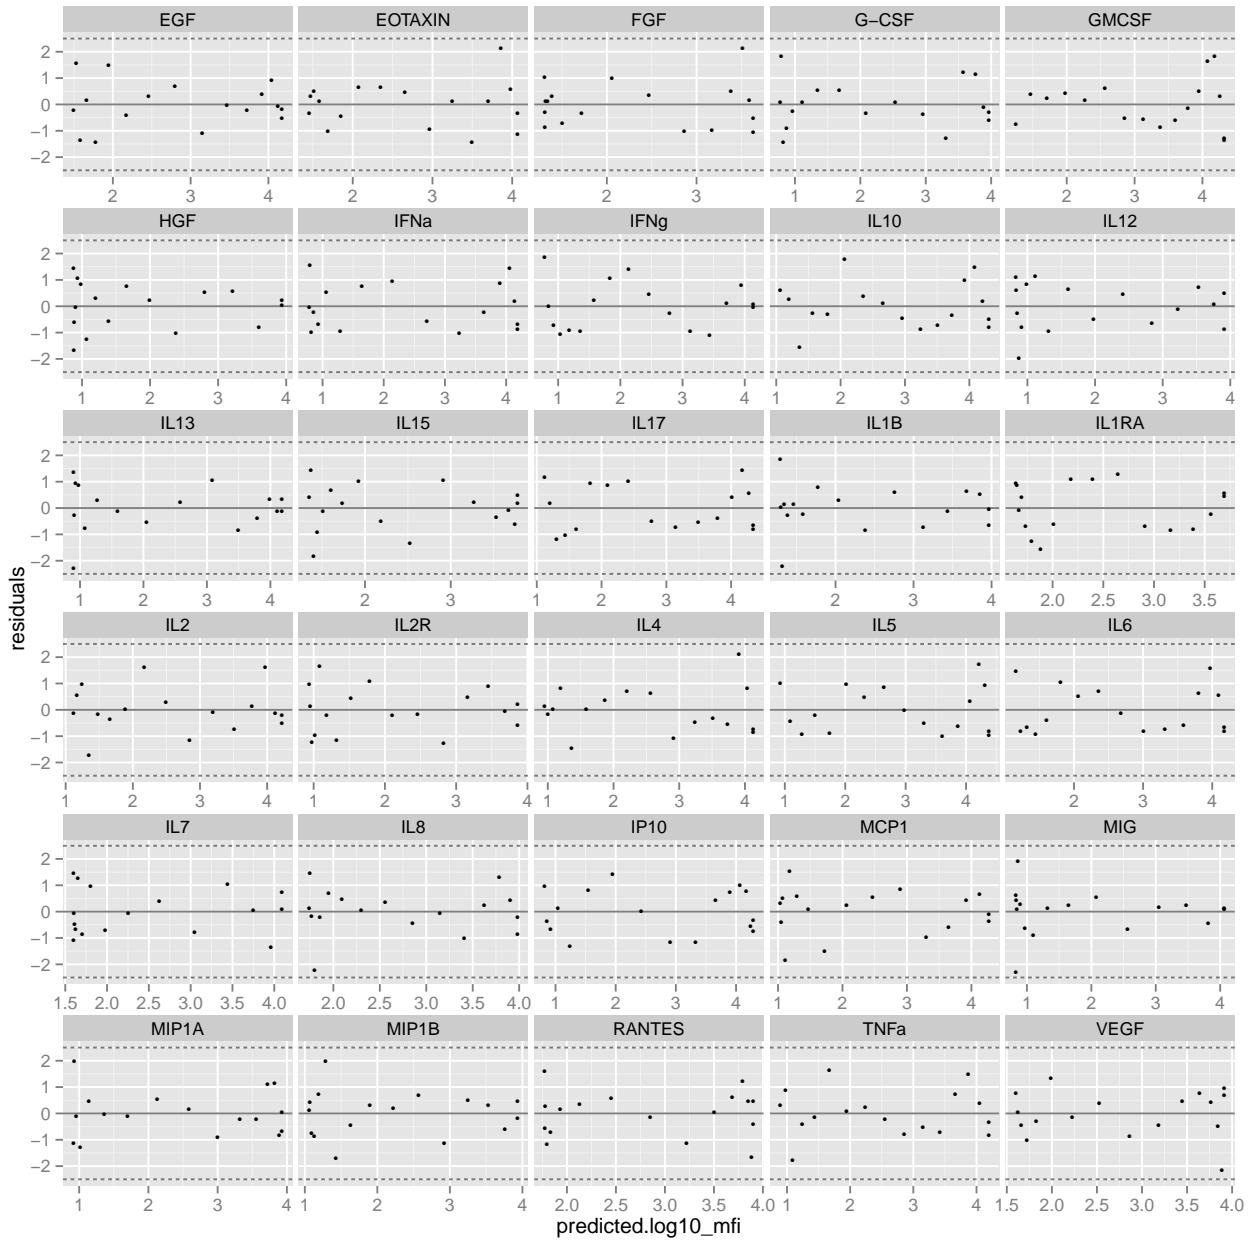

The type `qqplot` generates the Q-Q plot of the standardized residuals.

```
> plot(allanalytes, type = "qqplot", ncol=5, psize=1)
```

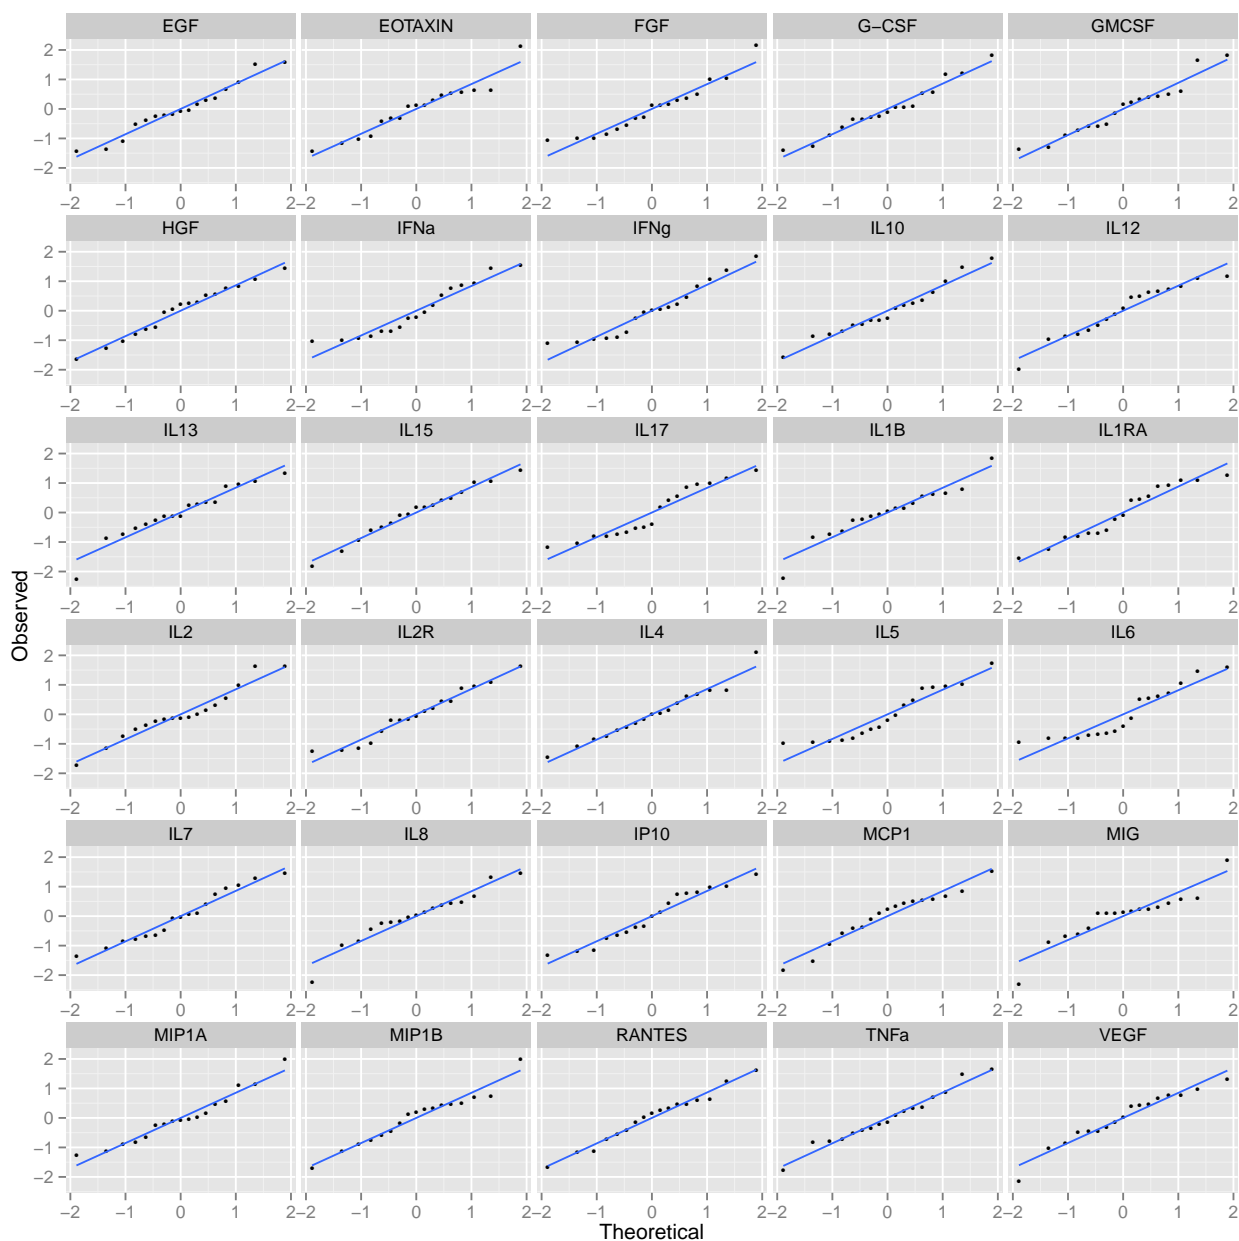

## 7 Flag data

The package implements several features to easily identify outliers. The function `get_outliers` allows to identify the points of the standard curve with a standardized residual greater than a specified value.

```
> get_outliers(allanalytes, out.limit=2)
  batch_well_analyte  batch  well analyte  flag observations
6   newplate*P1_H5*FGF newplate P1_H5    FGF  OUTLIER    2.153402
30  newplate*P1_A9*IL1B newplate P1_A9    IL1B  OUTLIER   -2.220823
85  newplate*P1_H11*IL13 newplate P1_H11  IL13  OUTLIER   -2.266228
142 newplate*P1_H5*EOTAXIN newplate P1_H5  EOTAXIN  OUTLIER    2.127560
```

|     |                     |          |        |              |           |
|-----|---------------------|----------|--------|--------------|-----------|
| 309 | newplate*P1_A3*VEGF | newplate | P1_A3  | VEGF OUTLIER | -2.136298 |
| 474 | newplate*P1_A10*MIG | newplate | P1_A10 | MIG OUTLIER  | -2.313133 |
| 482 | newplate*P1_H5*IL4  | newplate | P1_H5  | IL4 OUTLIER  | 2.099858  |
| 509 | newplate*P1_H10*IL8 | newplate | P1_H10 | IL8 OUTLIER  | -2.236779 |

As commented previously the plot of the residuals also allows to identify the same points

```
> plot(allanalytes, "residuals", out.limit=2, size.text=2.5)
```

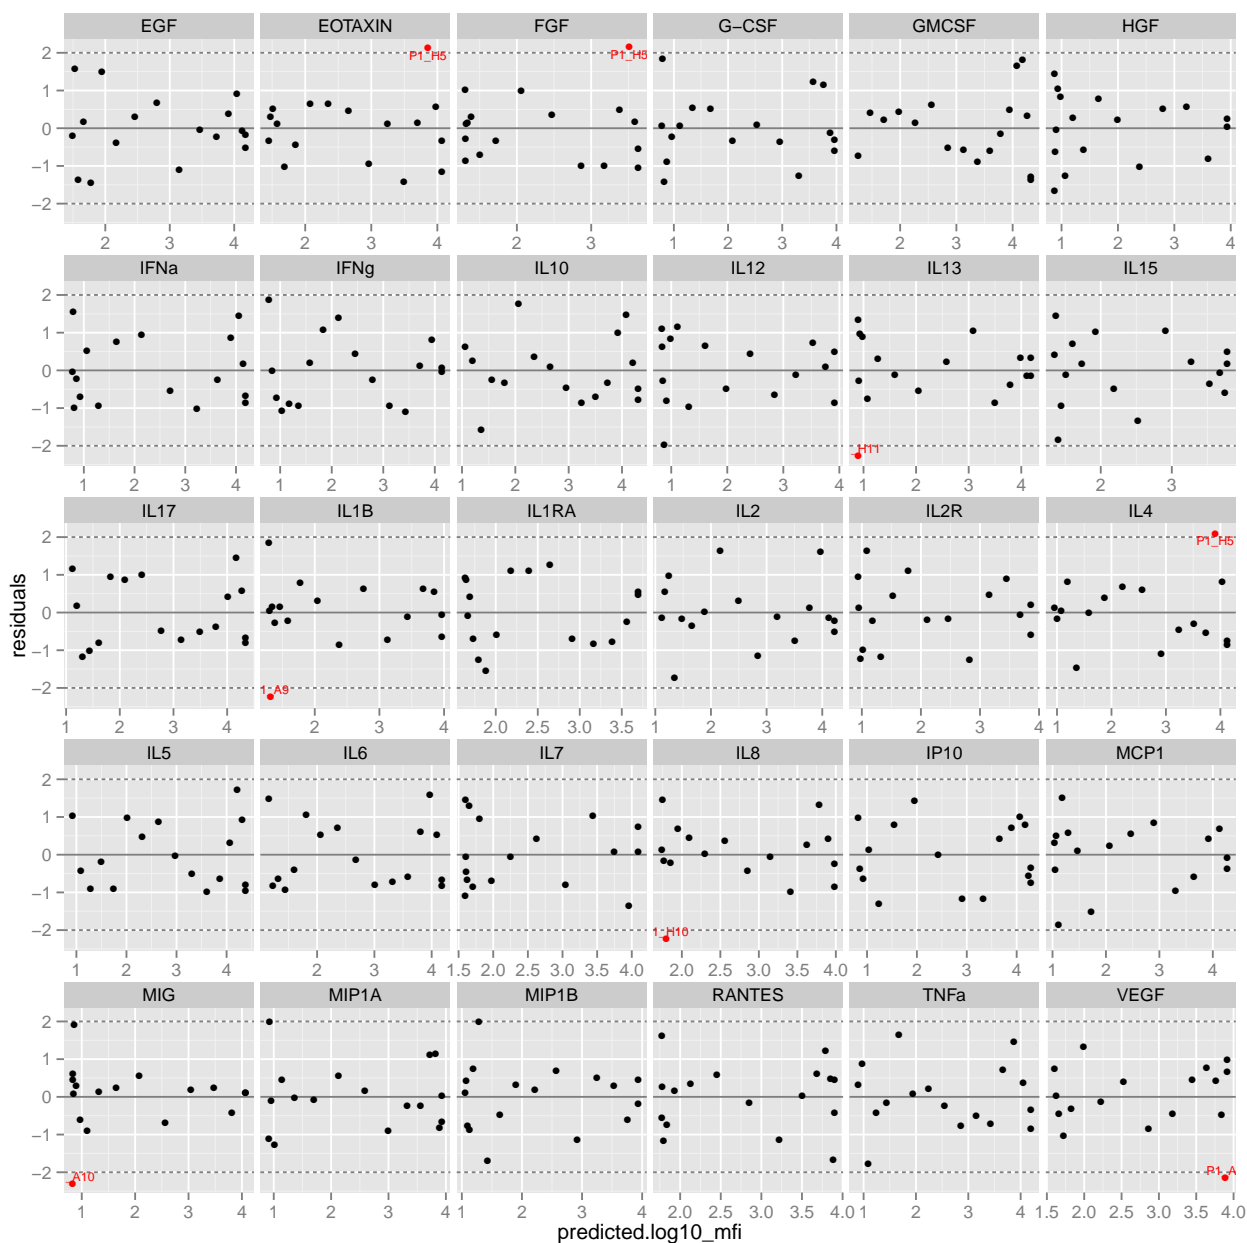

Once we have identified the outliers we can add this information to the data, using `data_selection` or the `merge` function.

```
> out <- get_outliers(allanalytes, out.limit=2)
> flag.dat <- merge(datasets$plate_1$standard, out, by=c("analyte", "well"), all.x=TRUE)
```

After we can run the `scluminex` function.

```

> flag.allanalytes <- scluminex(plateid = "newplate.flag",
+   standard = flag.dat,
+   background = datasets$plate_1$background,
+   bkg = "ignore", lfct = c("SS15","SS14"),
+   fmfi = "mfi", verbose = FALSE)

```

And plot the standard curve. The flagged points are shown as non-filled points but they are not included in the estimation of the curve.

```

> plot(flag.allanalytes, "scurve",
+   subset.list=c("FGF","IL1B", "IL13","EOTAXIN","VEGF","MIG","IL4","IL8"),
+   ncol=4, psize=2, size.legend=3)

```

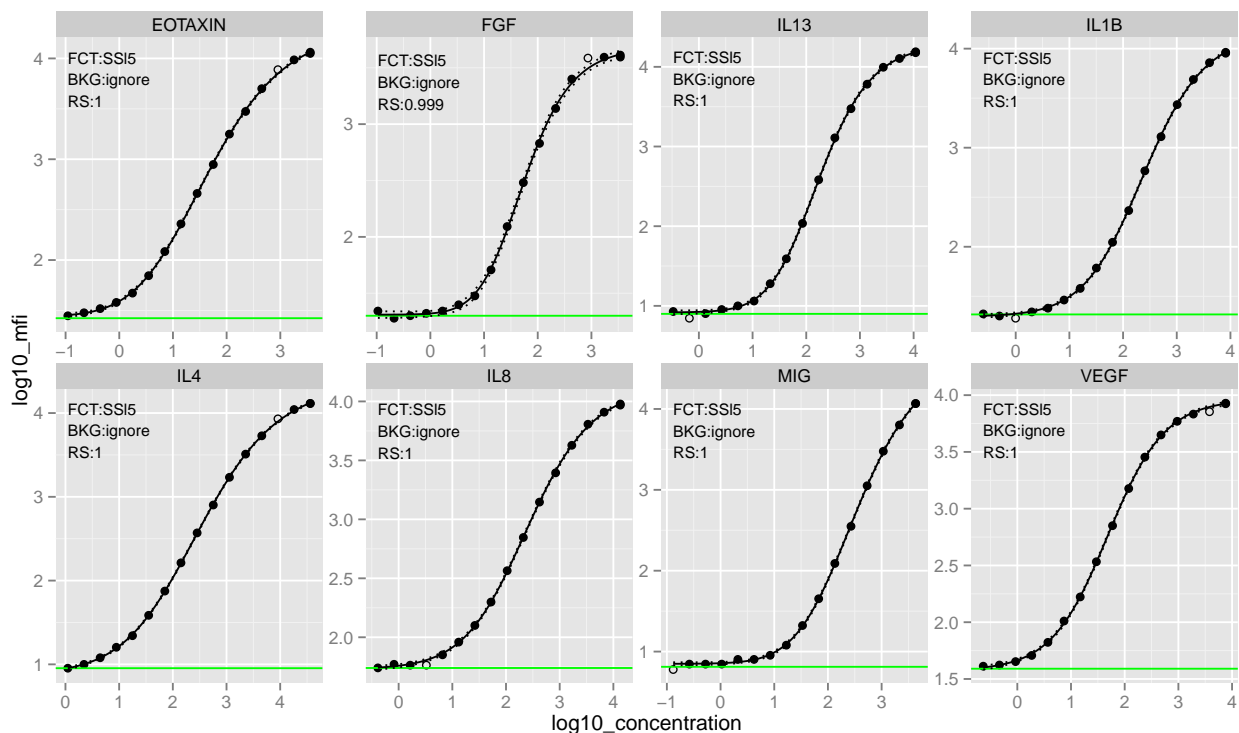

## 8 Raw data from xPONENT<sup>®</sup> software

The package allows to import CSV raw data that has been exported from xPONENT<sup>®</sup> software. The `lum_import` function identifies sections of information from this data. Moreover the function imports Bead raw data.

### 8.1 MFI raw data

There is an example of MFI raw data included in the package. The CSV file has several blocks of information that need to be extracted and restructured in order to analyze it. This raw data can be imported calling the `lum_import` function:

```

> imp_path <- system.file(c("inst","extdata"),"plate1.csv", package="drLumi")
> imp <- lum_import(imp_path)
> imp
The file imported is: Fluorescence type

```



```

Identified data type: Median
Identified data type: Net MFI
Identified data type: Count
Identified data type: Result
Identified data type: Range
Identified data type: Avg Net MFI
Identified data type: Avg Result
Identified data type: Avg Range
Identified data type: %CV Replicates
Identified data type: % Recovery
Identified data type: Comments
Identified data type: Units
Identified data type: Standard Expected Concentration
Identified data type: Control Expected Concentration
Identified data type: Control Range - Low
Identified data type: Control Range - High
Identified data type: Per Bead Count
Identified data type: Dilution Factor
Identified data type: Analysis Types
Identified data type: Analysis Coefficients
Identified data type: R^2
Identified data type: Audit Logs
Identified data type: Warnings/Errors

```

The function identifies the section parts of the CSV file and groups the data in several datasets. The `lum_import` object has the following objects:

- `dtblock`: blocks of information from original CSV file.
- `raw_metadata`: a `data.frame` with the information of batch (software version, operator, batch date ...).
- `vars` type object: variables that are going to be exported in the `lum_export` function. These variables can be modified in order to remove or add more.
- `name_batch`: the name of the batch as it is described in raw data.
- `type_raw_data`: Fluorescence (MFI values for samples) or Bead (for Bead data).

After the identification of the raw data is necessary to extract the information from the `lum_import` object. This can be done using the `lum_export` function which generates several datasets based on the identified sections and the specified variables:

```

> expdb <- lum_export(imp)
> expdb
Dataframes:
well scurve average batch region sample name_batch

```

As described previously variables can be removed (or new ones can be added). Following is an example for the selection of 2 variables from the well dataset:

```

> imp$well_vars
[1] "Median"      "Net MFI"     "Count"       "Result"      "Range"
[6] "% Recovery"  "Comments"
> imp$well_vars <- c("Median", "Net MFI")
> exp <- lum_export(imp)

```

```
> head(exp$well)
  batch_well_analyte  batch well analyte      sample median net_mfi
1  plate_1*P1_A1*FGF plate_1 P1_A1    FGF   Background0     21      1
2  plate_1*P1_B1*FGF plate_1 P1_B1    FGF     Control1    2902    2882
3  plate_1*P1_C1*FGF plate_1 P1_C1    FGF  B_sid_13_CSP     18     -2
4  plate_1*P1_D1*FGF plate_1 P1_D1    FGF  B_sid_13_DMSO     19     -1
5  plate_1*P1_E1*FGF plate_1 P1_E1    FGF  B_sid_13_HBS     17     -3
6  plate_1*P1_F1*FGF plate_1 P1_F1    FGF  B_sid_13_AMA1     18     -2
```

## 8.2 Bead raw data

Bead raw data has several files (usually one file per well). This type of data can be imported either from a folder or from a zip file. The function assumes that all well files within the folder are in CSV format and try to combine all information. To identify the files new variables are added:

- well: with the name of the CSV file
- batch: the name of the file
- batch\_well\_eventno: a combination of well, batch and eventno variables.

Reading non-zip compressed data:

```
> imp_path_nozip <- system.file(c("inst","extdata"),"bead_data",
+                               package="drLumi")
> bead_nozip <- lum_import(imp_path_nozip)
> bead_nozip
The file imported is: Bead type
Number of unique wells files 2
```

The code for reading zip files is the same as reading non-compressed files and returns the same information. The only difference is that first unzip the file and creates a new folder with the same name as the original in the same directory where the zip file is located.

All CSV files are combined in one `data.frame`:

```
> head(bead_nozip$bead_files)
  eventno rid dbl    dd rp1 cl1 cl2 aux1 time      well      batch
1      0  0  0 24977  13 117  0  0  0 plate_P1_A1 bead_data
2      1  0  0 25917  0 281  10  0  0 plate_P1_A1 bead_data
3      2  0  0 26555  0 394  17  0  0 plate_P1_A1 bead_data
4      3  0  0 24832  0  68  0  0  0 plate_P1_A1 bead_data
5      4  0  0 28166  0 419  29  0  0 plate_P1_A1 bead_data
6      5  0  0 27034  0 404  29  0  0 plate_P1_A1 bead_data

  batch_well_eventno
1 bead_data*plate_P1_A1*0
2 bead_data*plate_P1_A1*1
3 bead_data*plate_P1_A1*2
4 bead_data*plate_P1_A1*3
5 bead_data*plate_P1_A1*4
6 bead_data*plate_P1_A1*5
```

And the files are identifiable by the well variable:

```
> with(bead_nozip$bead_files, table(well, batch))
```

| well        | batch |
|-------------|-------|
| plate_P1_A1 | 4981  |
| plate_P1_A2 | 4647  |

## References

- [1] DEFAWE, O., FONG, Y., VASILYEVA, E., PICKETT, M., CARTER, D., GABRIEL, E., RERKS-NGARM, S., NITYAPHAN, S., FRAHM, N., MCELDRATH, M., AND ROSA, S. D. Optimization and qualification of a multiplex bead array to assess cytokine and chemokine production by vaccine-specific cells. *J Immunol Methods*. 382 (2012), 117–128.
- [2] ELZHOV, T., MULLEN, K. M., SPIESS, A.-N., AND BOLKER, B. *minpack.lm: R interface to the Levenberg-Marquardt nonlinear least-squares algorithm found in MINPACK, plus support for bounds*, 2013. R package version 1.1.8.
- [3] GAMER, M., LEMON, J., FELLOWS, I., AND PUSPENDRA, S. *irr: Various Coefficients of Interrater Reliability and Agreement*, 2012. R package version 0.84.
- [4] GOTTSCHALK, P., AND DUNN, J. Determining the error of dose estimates and minimum and maximum acceptable concentrations from assays with nonlinear dose-response curves. *Comput. Methods Programs Biomed* 80 (2005), 204–215.
- [5] JACKSON, C. *msm: Multi-state Markov and hidden Markov models in continuous time*, 2014. R package version 1.4.
- [6] NEILL, J. Testing for lack of fit in nonlinear regression. *Ann. Statist.* 16 (1988), 733–740.
- [7] QUINN, C. P., SEMENOVA, V. A., ELIE, C. M., SANDRA ROMERO-STEINER, C. G., LI, H., STAMEY, K., STEWARD-CLARK, E., SCHMIDT, D. S., MOTHERSHED, E., PRUCKLER, J., SCHWARTZ, S., BENSON, R. F., HELSEL, L. O., HOLDER, P. F., JOHNSON, S. E., KELLUM, M., MESSMER, T., THACKER, W. L., BESSER, L., PLIKAYTIS, B. D., TAYLOR, T. H., FREEMAN, A. E., WALLACE, K. J., DULL, P., SEJVAR, J., BRUCE, E., MORENO, R., SCHUCHAT, A., LINGAPPA, J. R., MARTIN, S. K., WALLS, J., BRONSDON, M., CARLONE, G. M., BAJANI-ARI, M., ASHFORD, D. A., STEPHENS, D. S., AND PERKINS, B. A. Specific, sensitive, and quantitative enzyme-linked immunosorbent assay for human immunoglobulin g antibodies to anthrax toxin protective antigen. *Emerg Infect Dis* 10 (2002), 1103–1110.
- [8] REED, G., LYNN, F., AND MEADE, B. Use of coefficient of variation in assessing variability of quantitative assays. *Clin Diagn Lab Immunol* 9 (2002), 1235–1239.
- [9] RITZ, C., AND SPIESS, A. qpcr: an r package for sigmoidal model selection in quantitative real-time polymerase chain reaction analysis. *Bioinformatics* 24 (2008), 1549–1551.
- [10] RITZ, C., AND STREBIG, J. *drc: Analysis of dose-response curve data*, 2013. R package version 2.3-96.
- [11] RUCKSTUHL, A. *Introduction to Nonlinear Regression*, 2010.
