# Supplementary material
Source: publisher figshare collection journal article supplement (https://plos.figshare.com/articles/dataset/_/5600665)

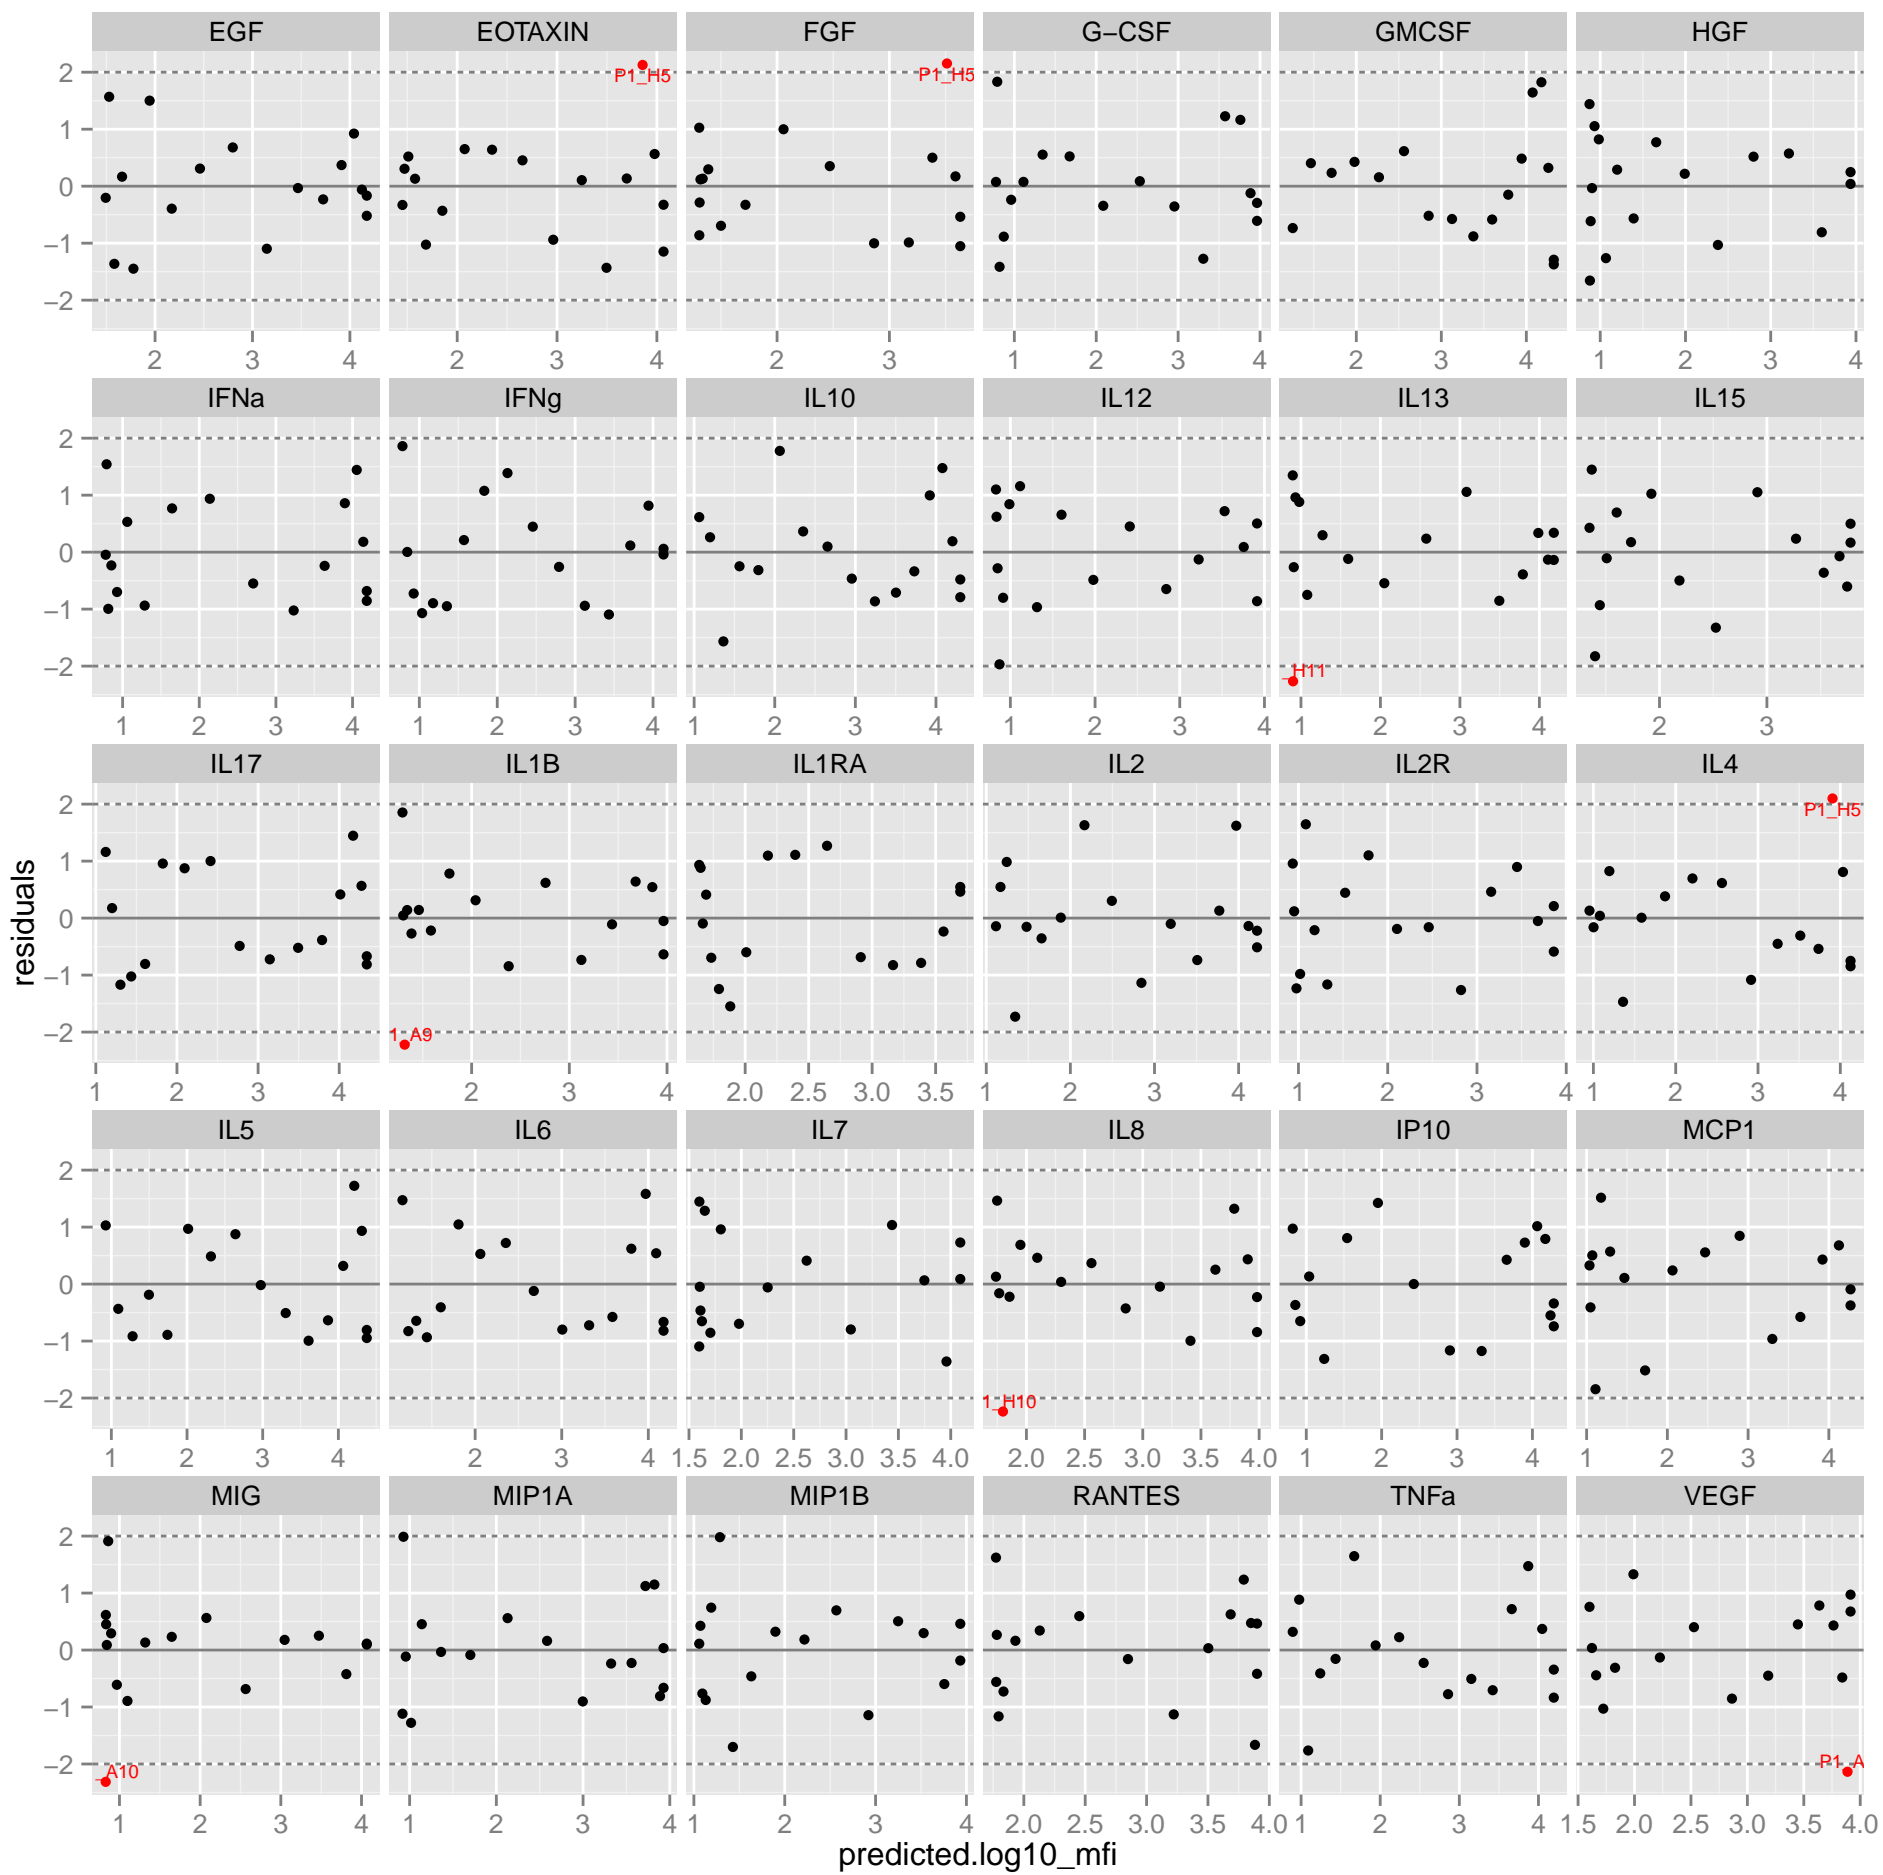

Supplement: Supplementary file 1 [file 1]

FGF

$\log_{10\_mfi}$

$\log_{10\_concentration}$

3

2

1

0

-1

0

1

2

3

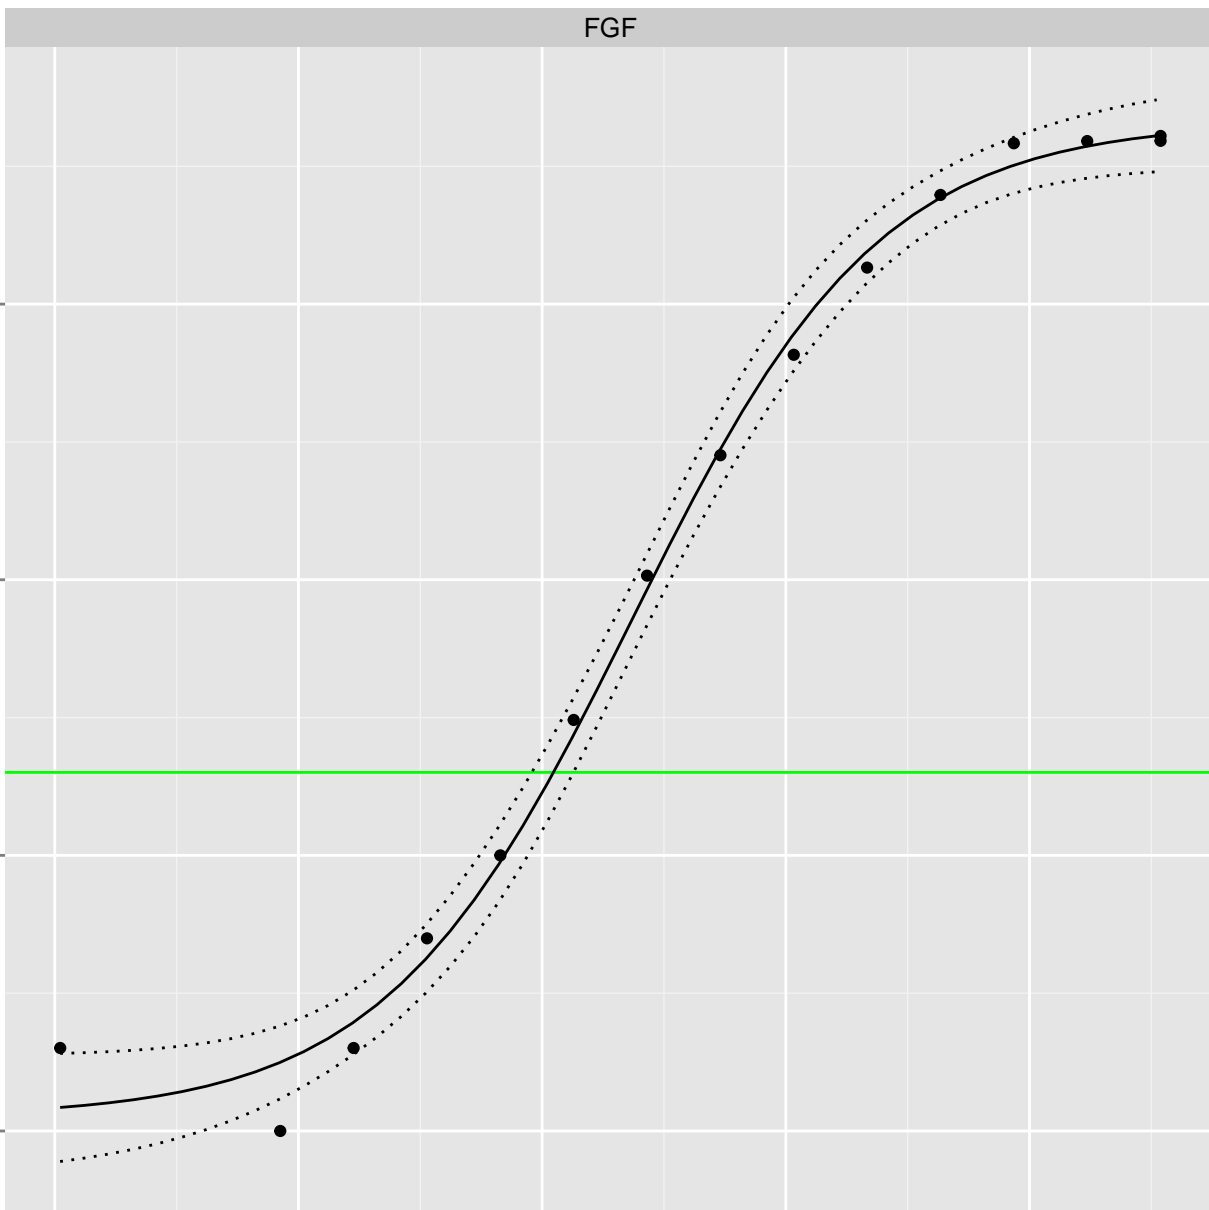

Supplement: Supplementary file 2 [file 1]

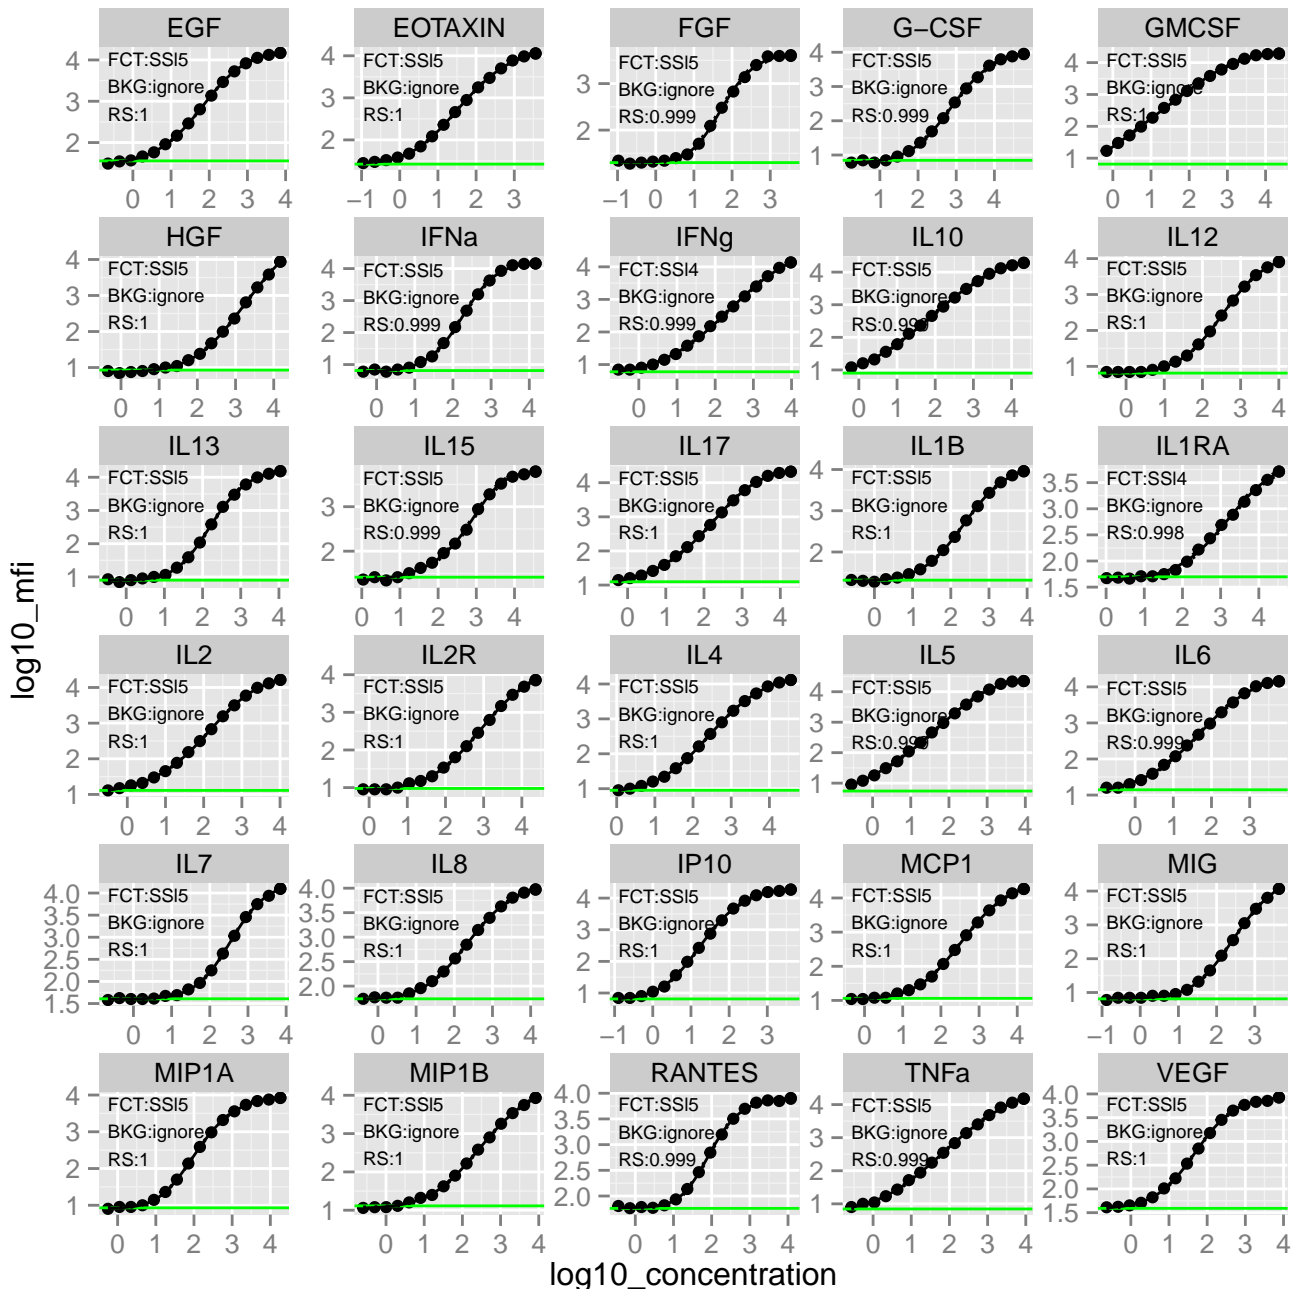

Supplement: Supplementary file 3 [file 1]

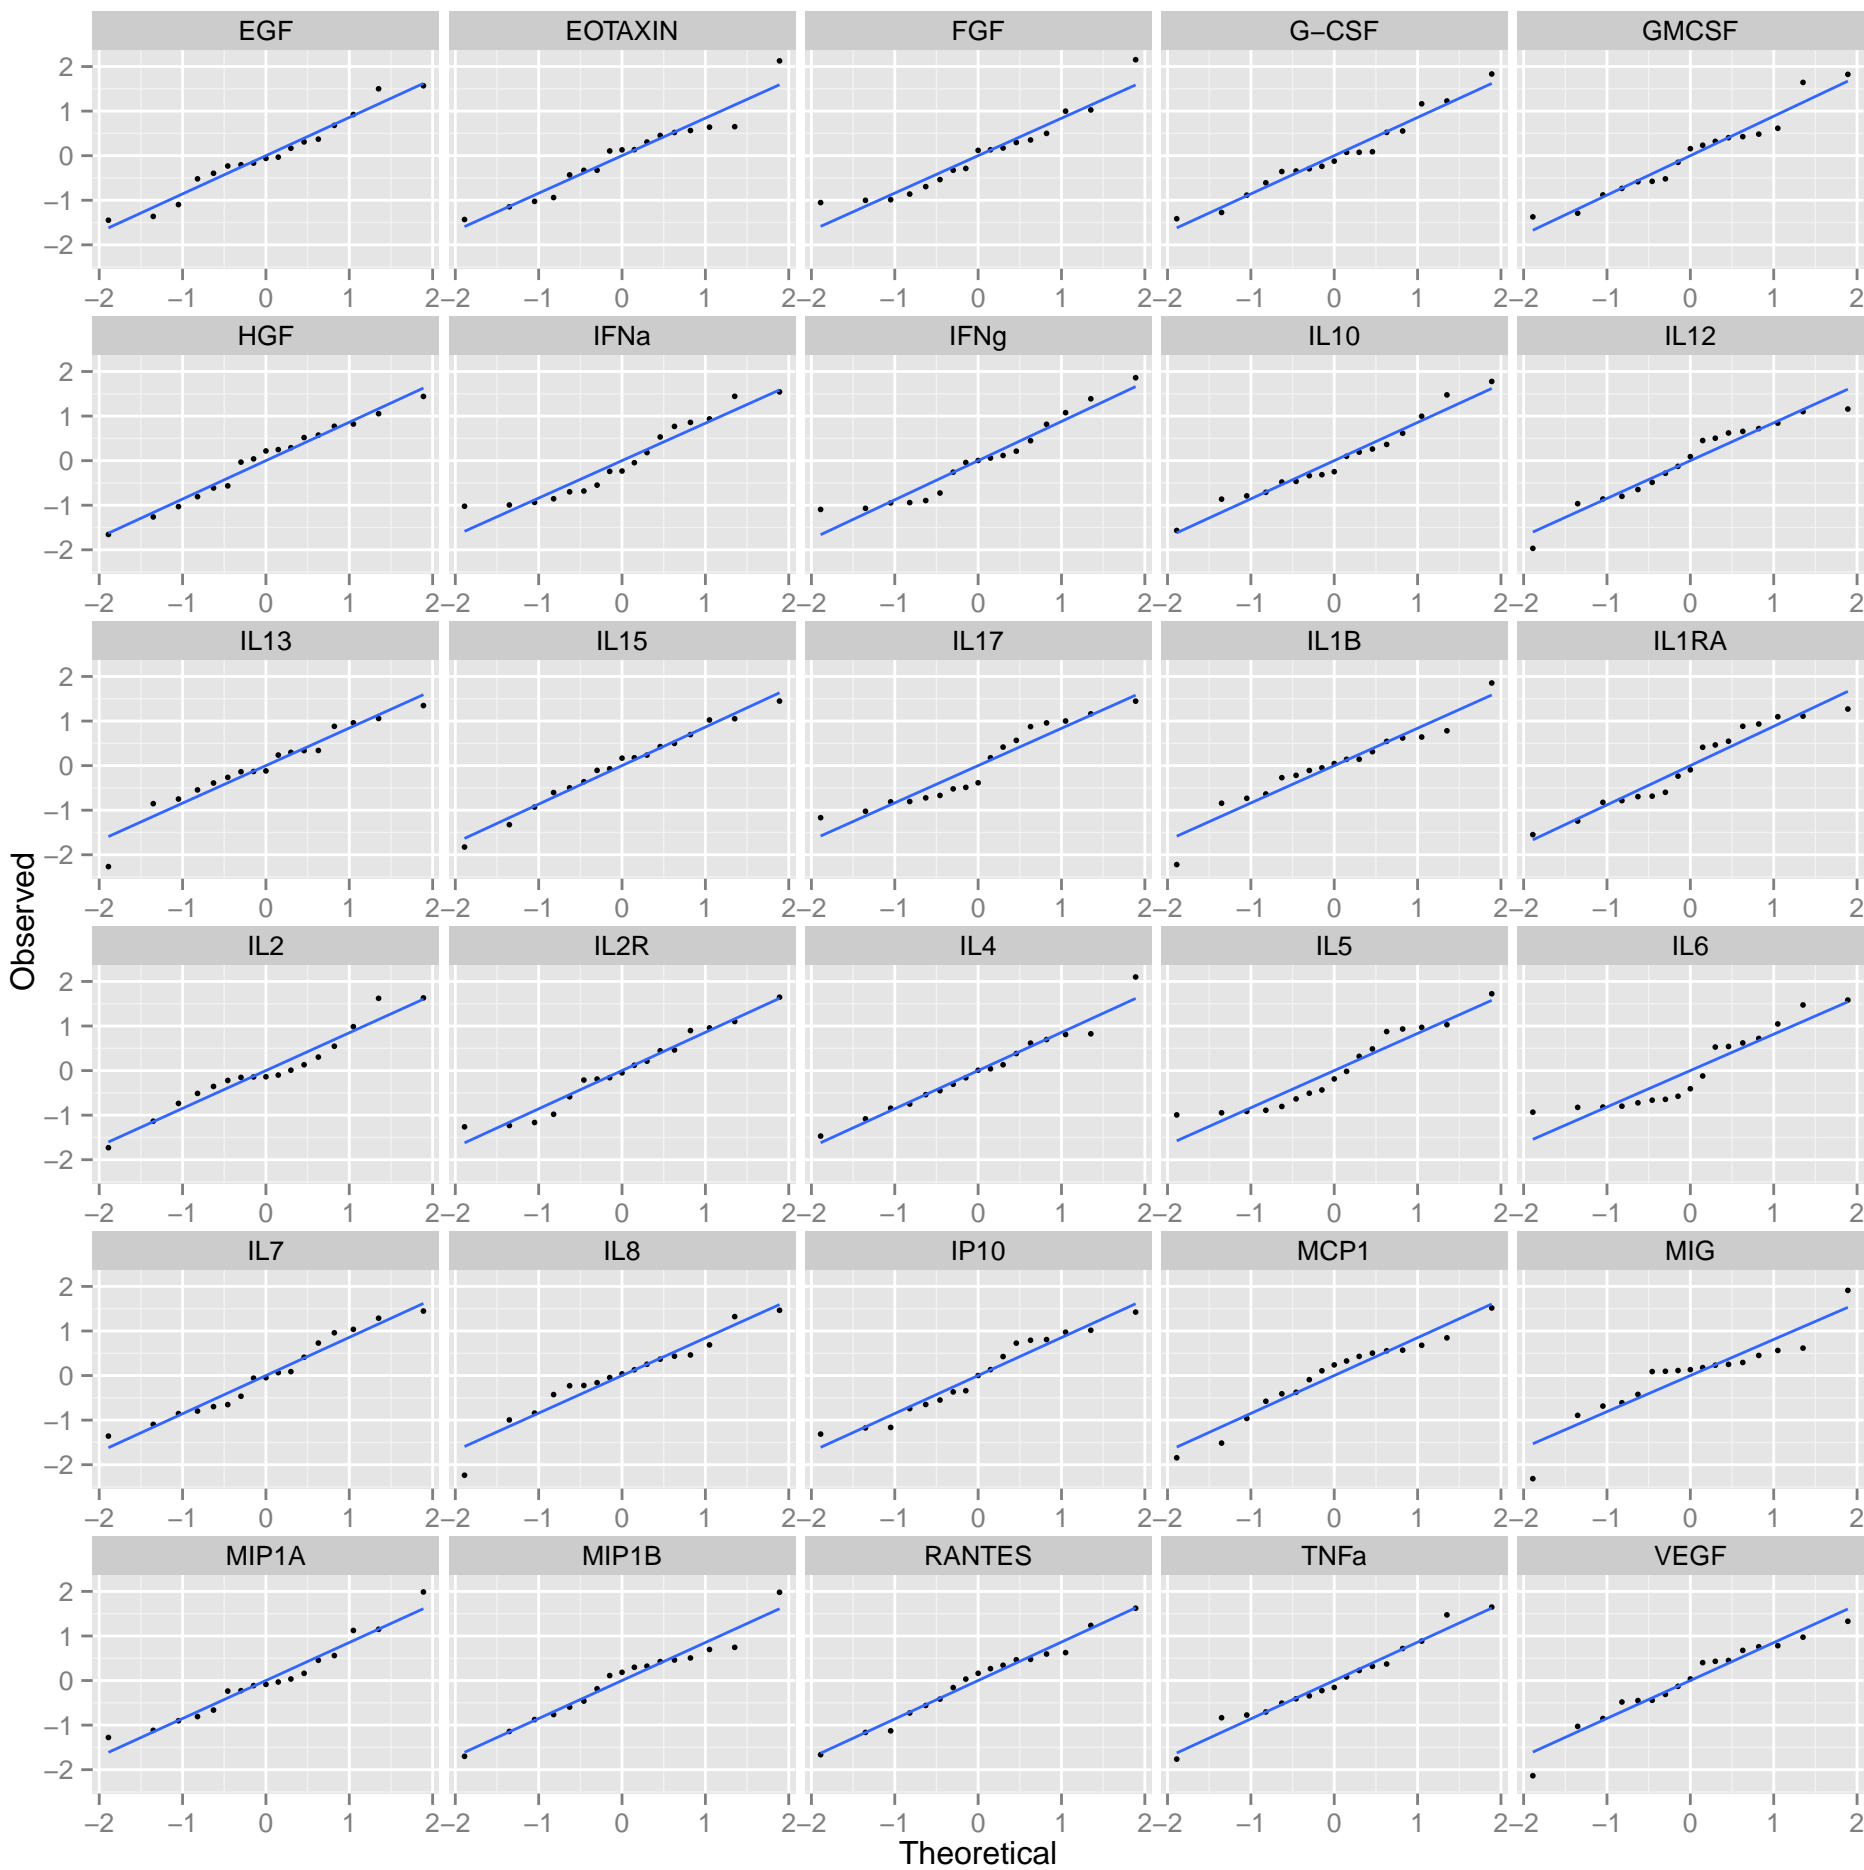

Supplement: Supplementary file 4 [file 1]

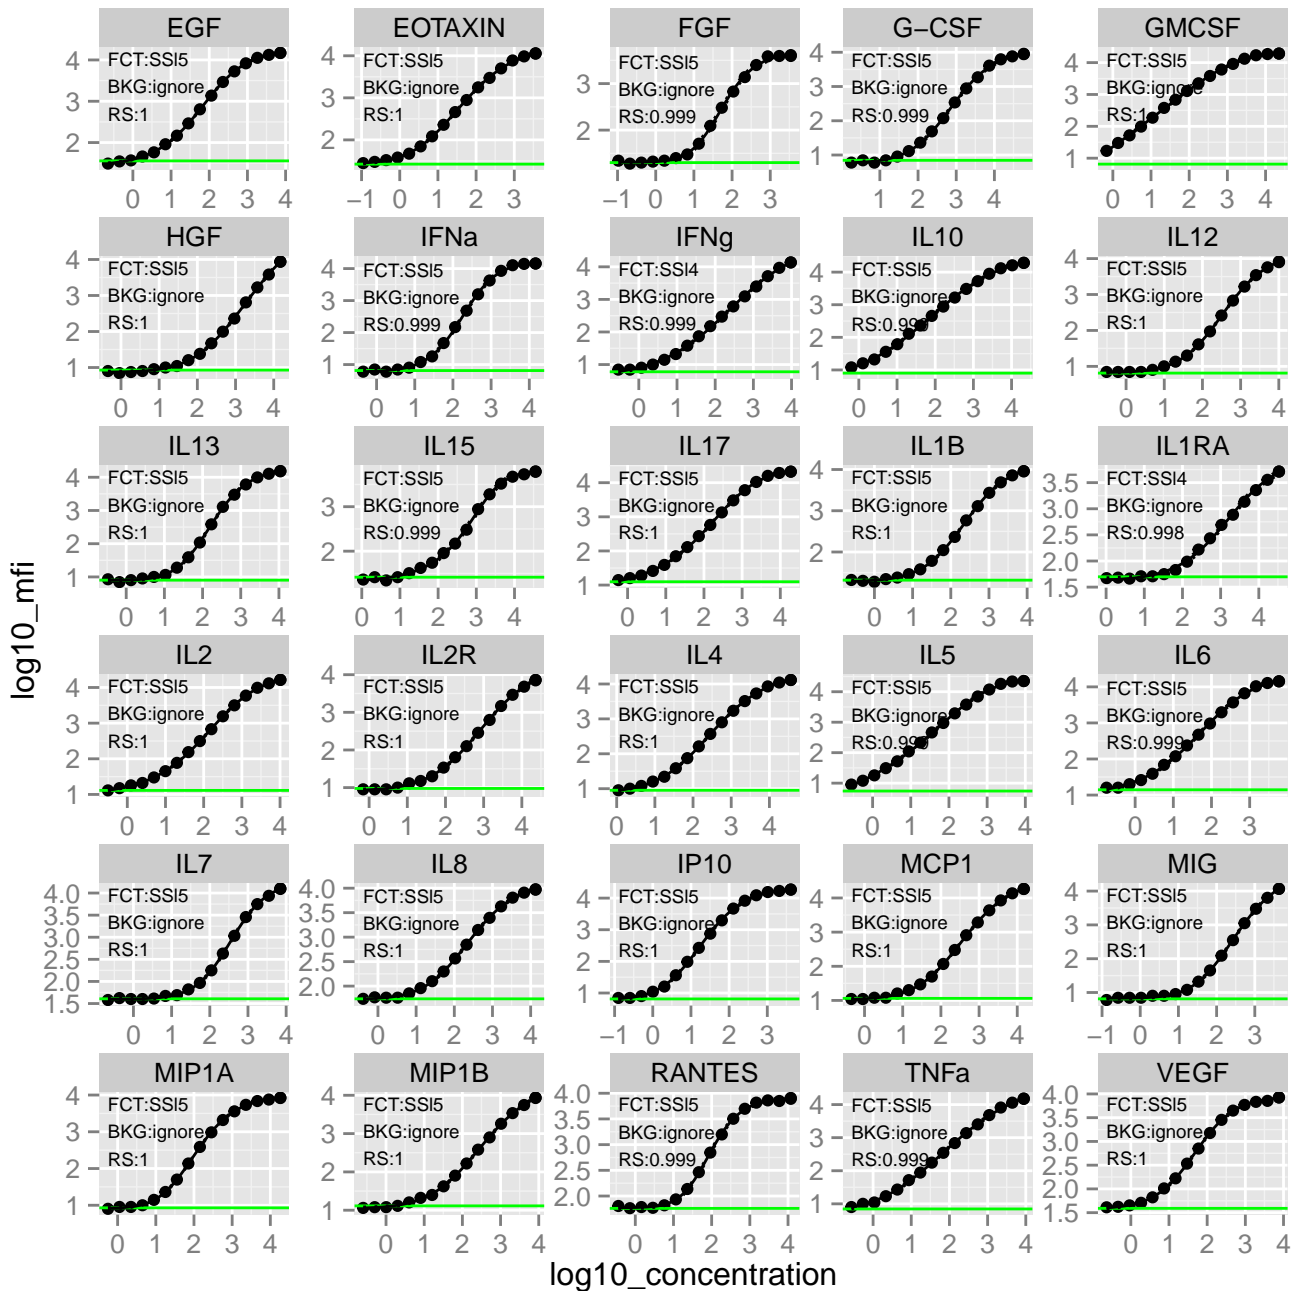

Supplement: Supplementary file 5 [file 1]

Ignored

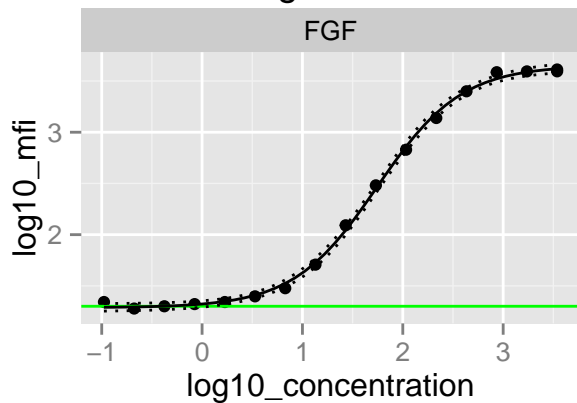

Subtracted

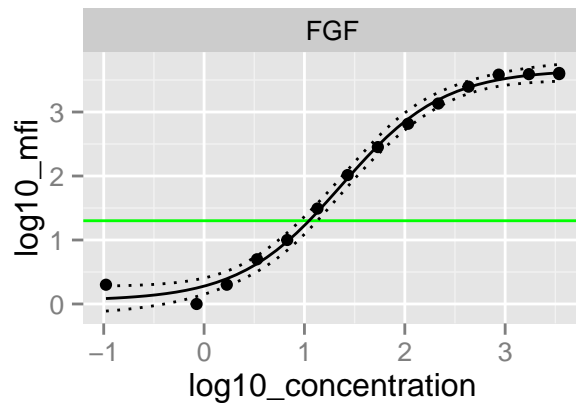

Included

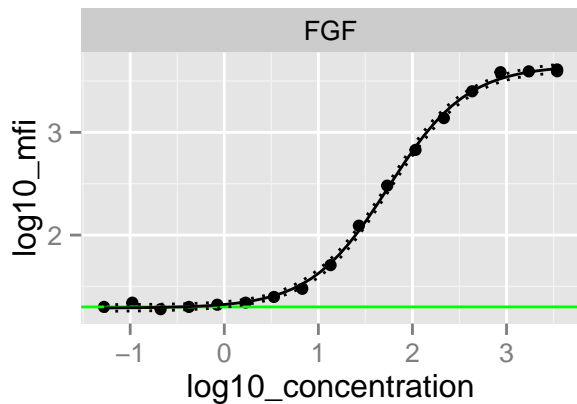

Constrained

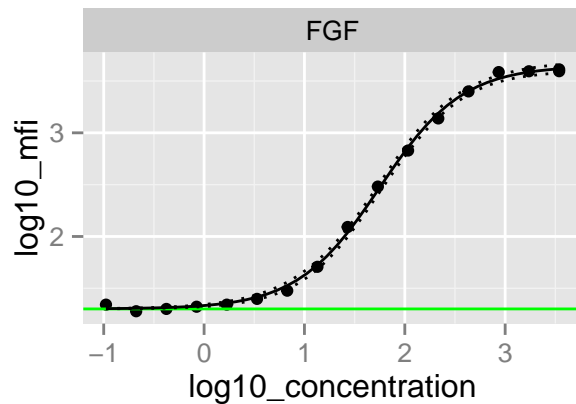

Supplement: Supplementary file 6 [file 1]

# 4 parameter logistic function

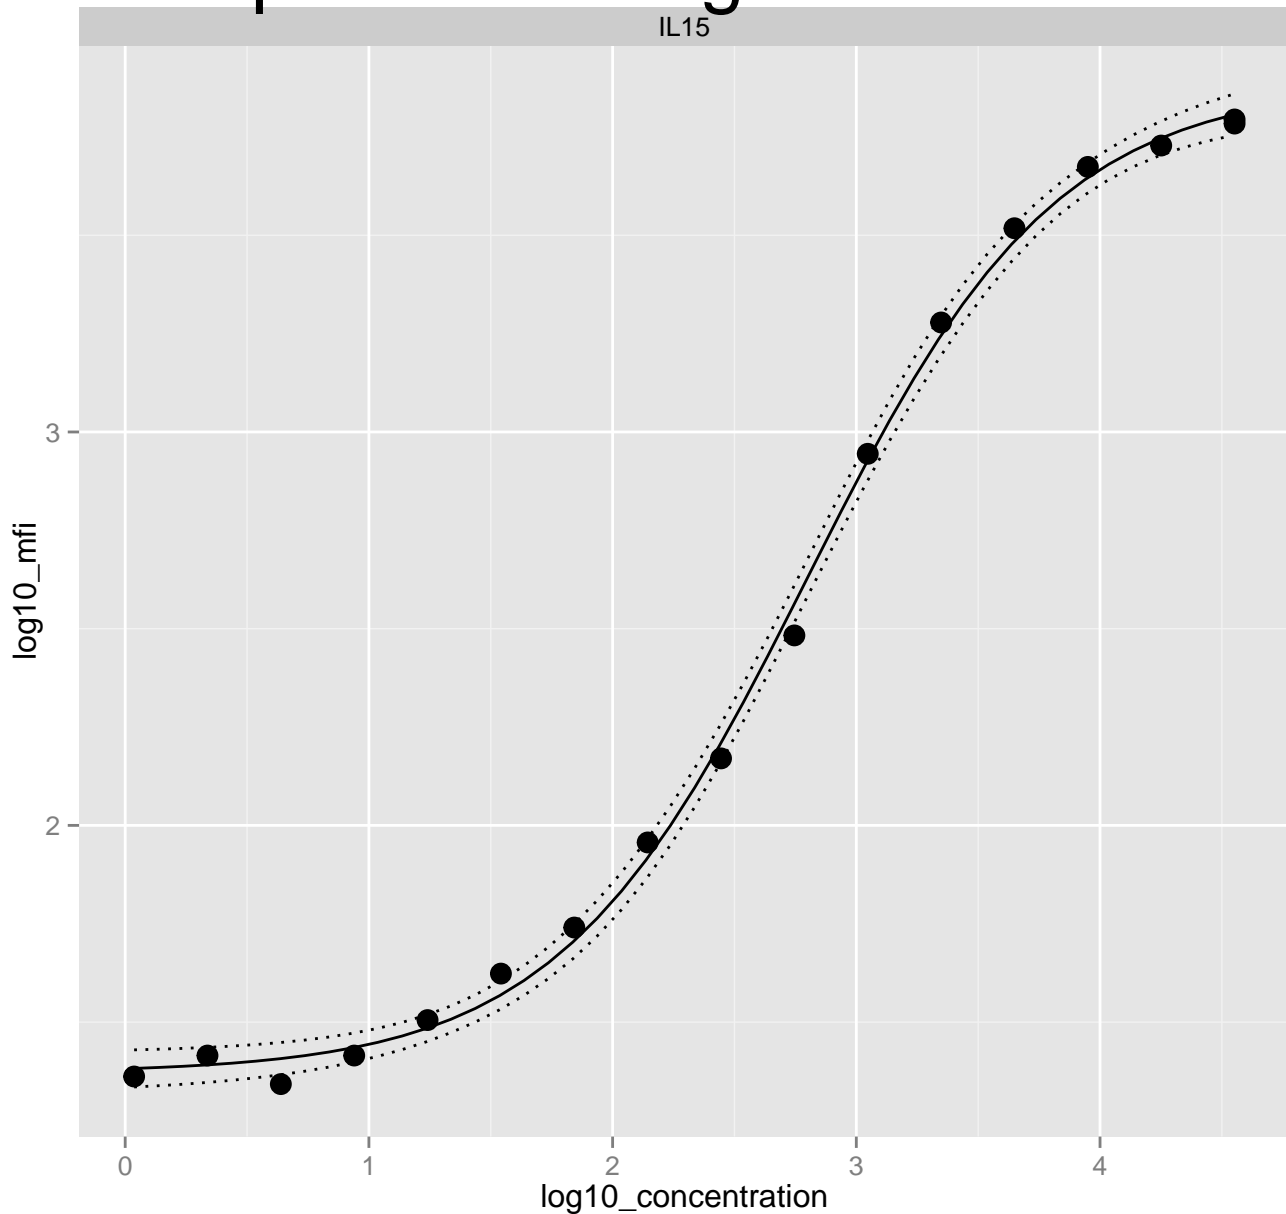

Supplement: Supplementary file 7 [file 1]

$y + 2$

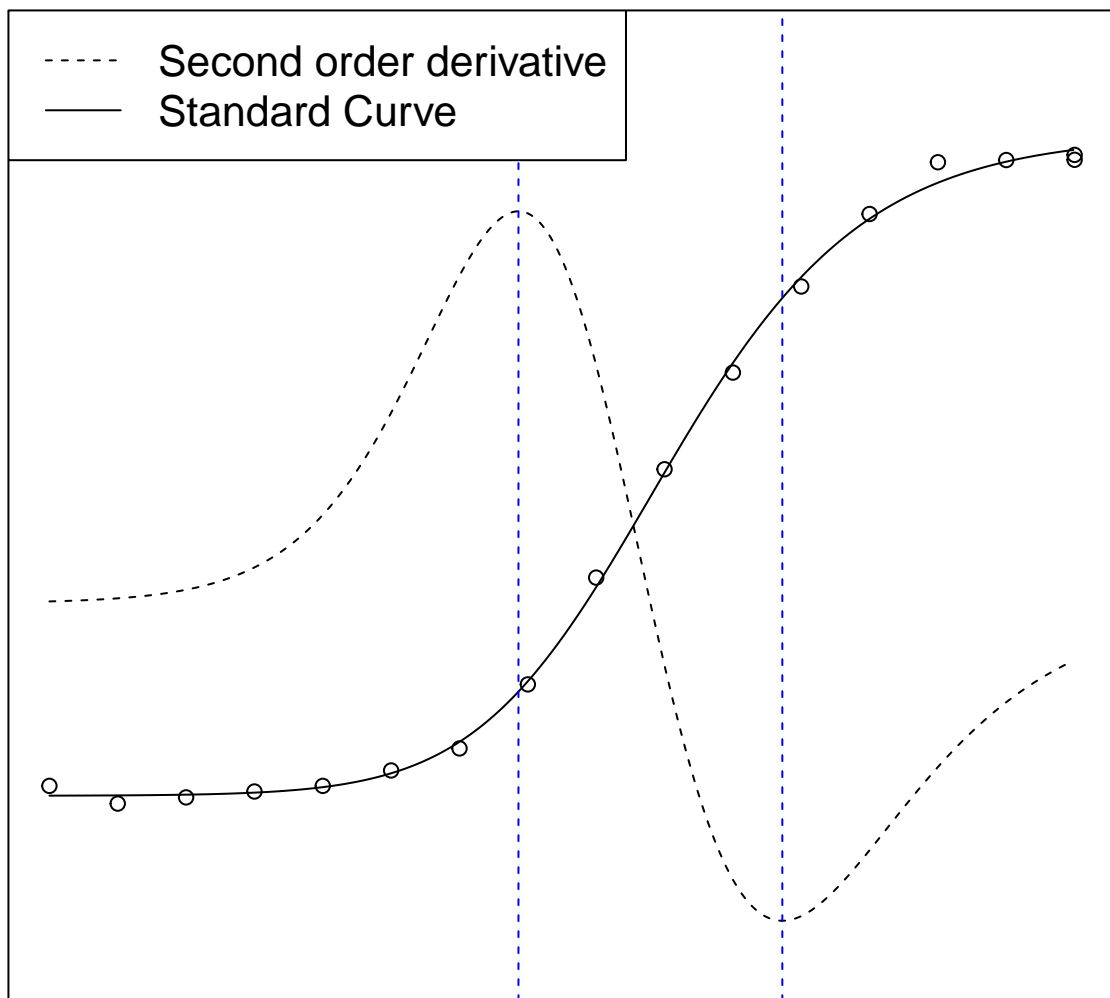

suport

Supplement: Supplementary file 8 [file 1]

# Exponential growth

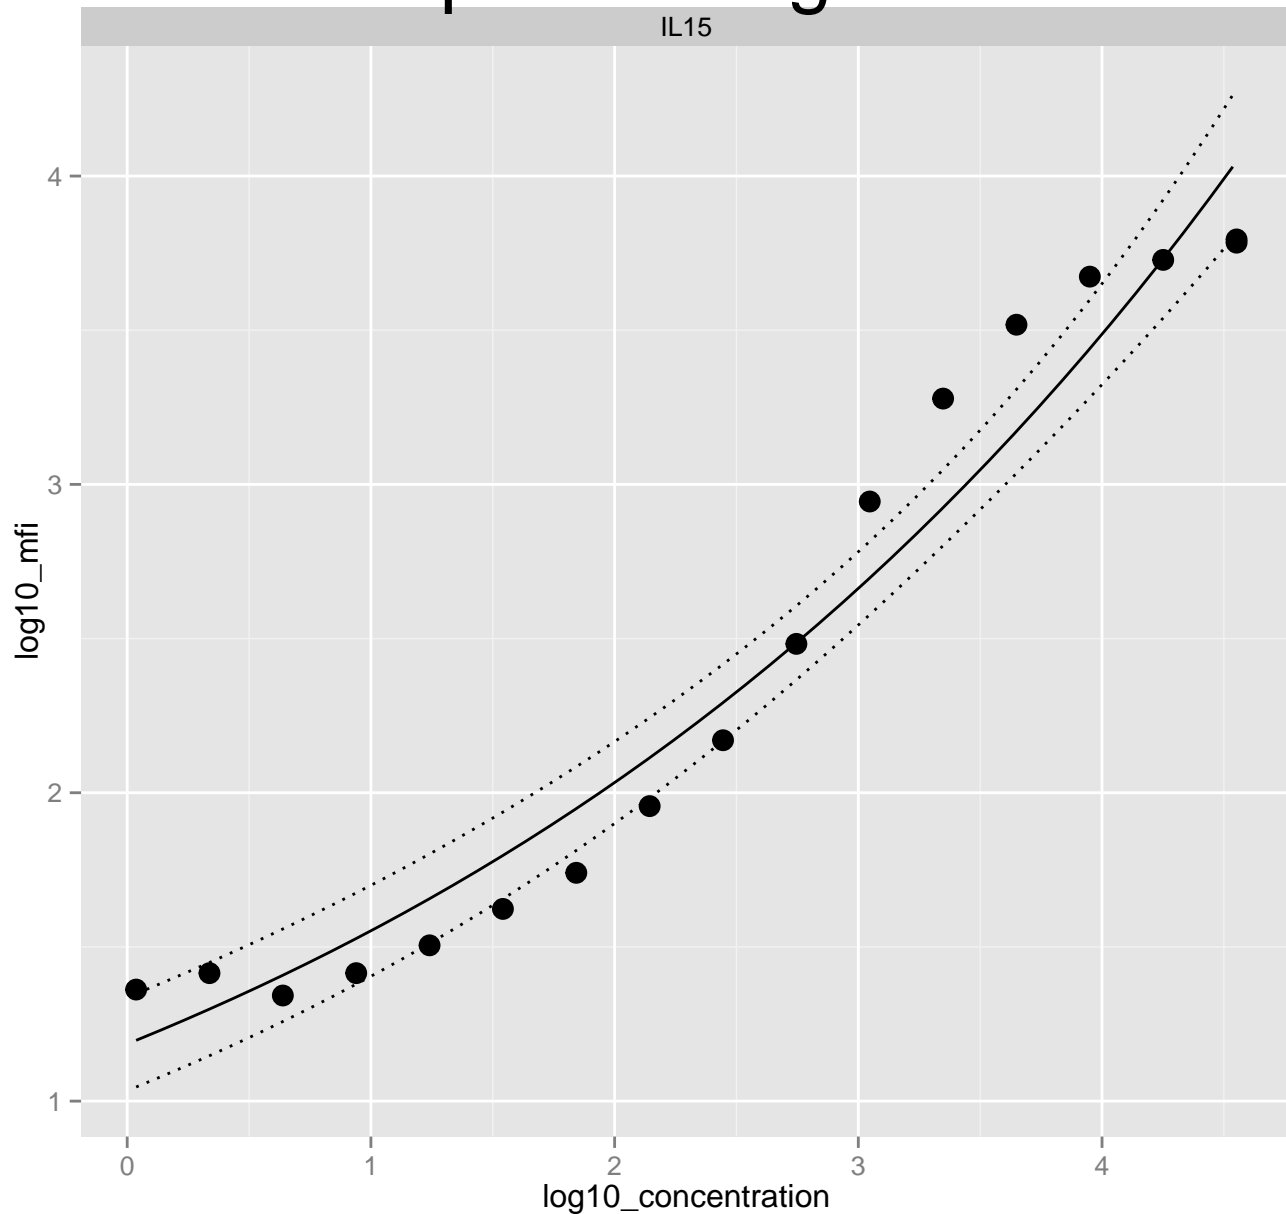

Supplement: Supplementary file 9 [file 1]

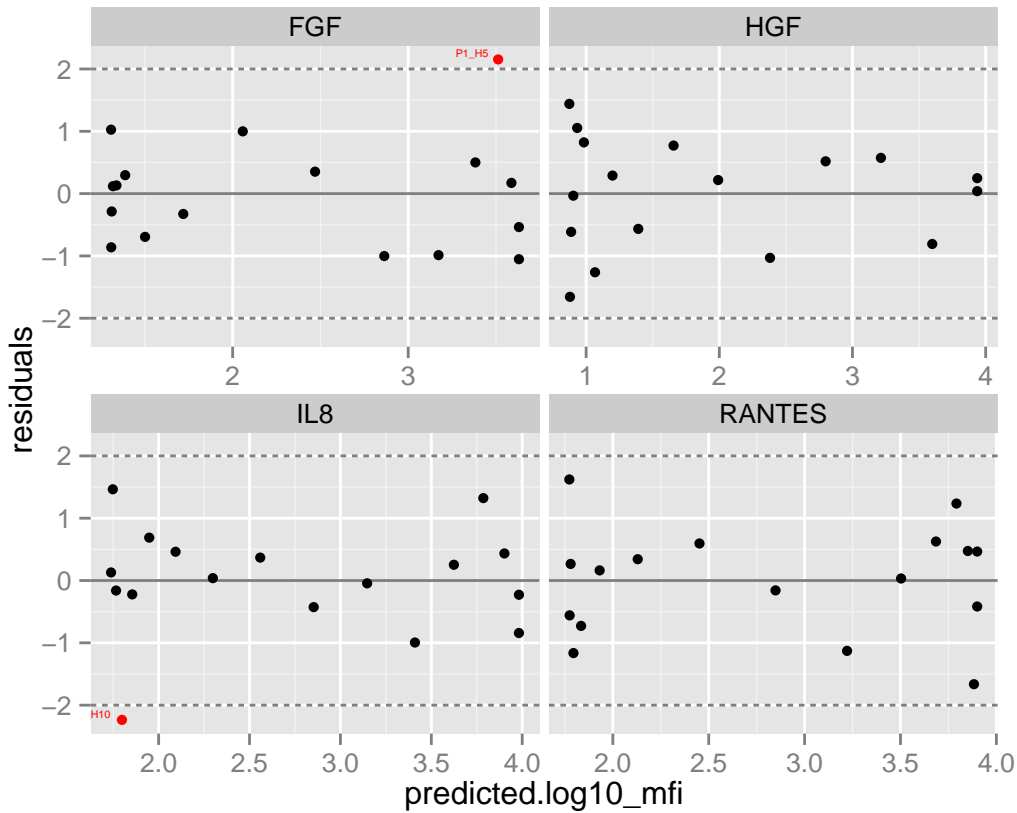

Supplement: Supplementary file 10 [file 1]

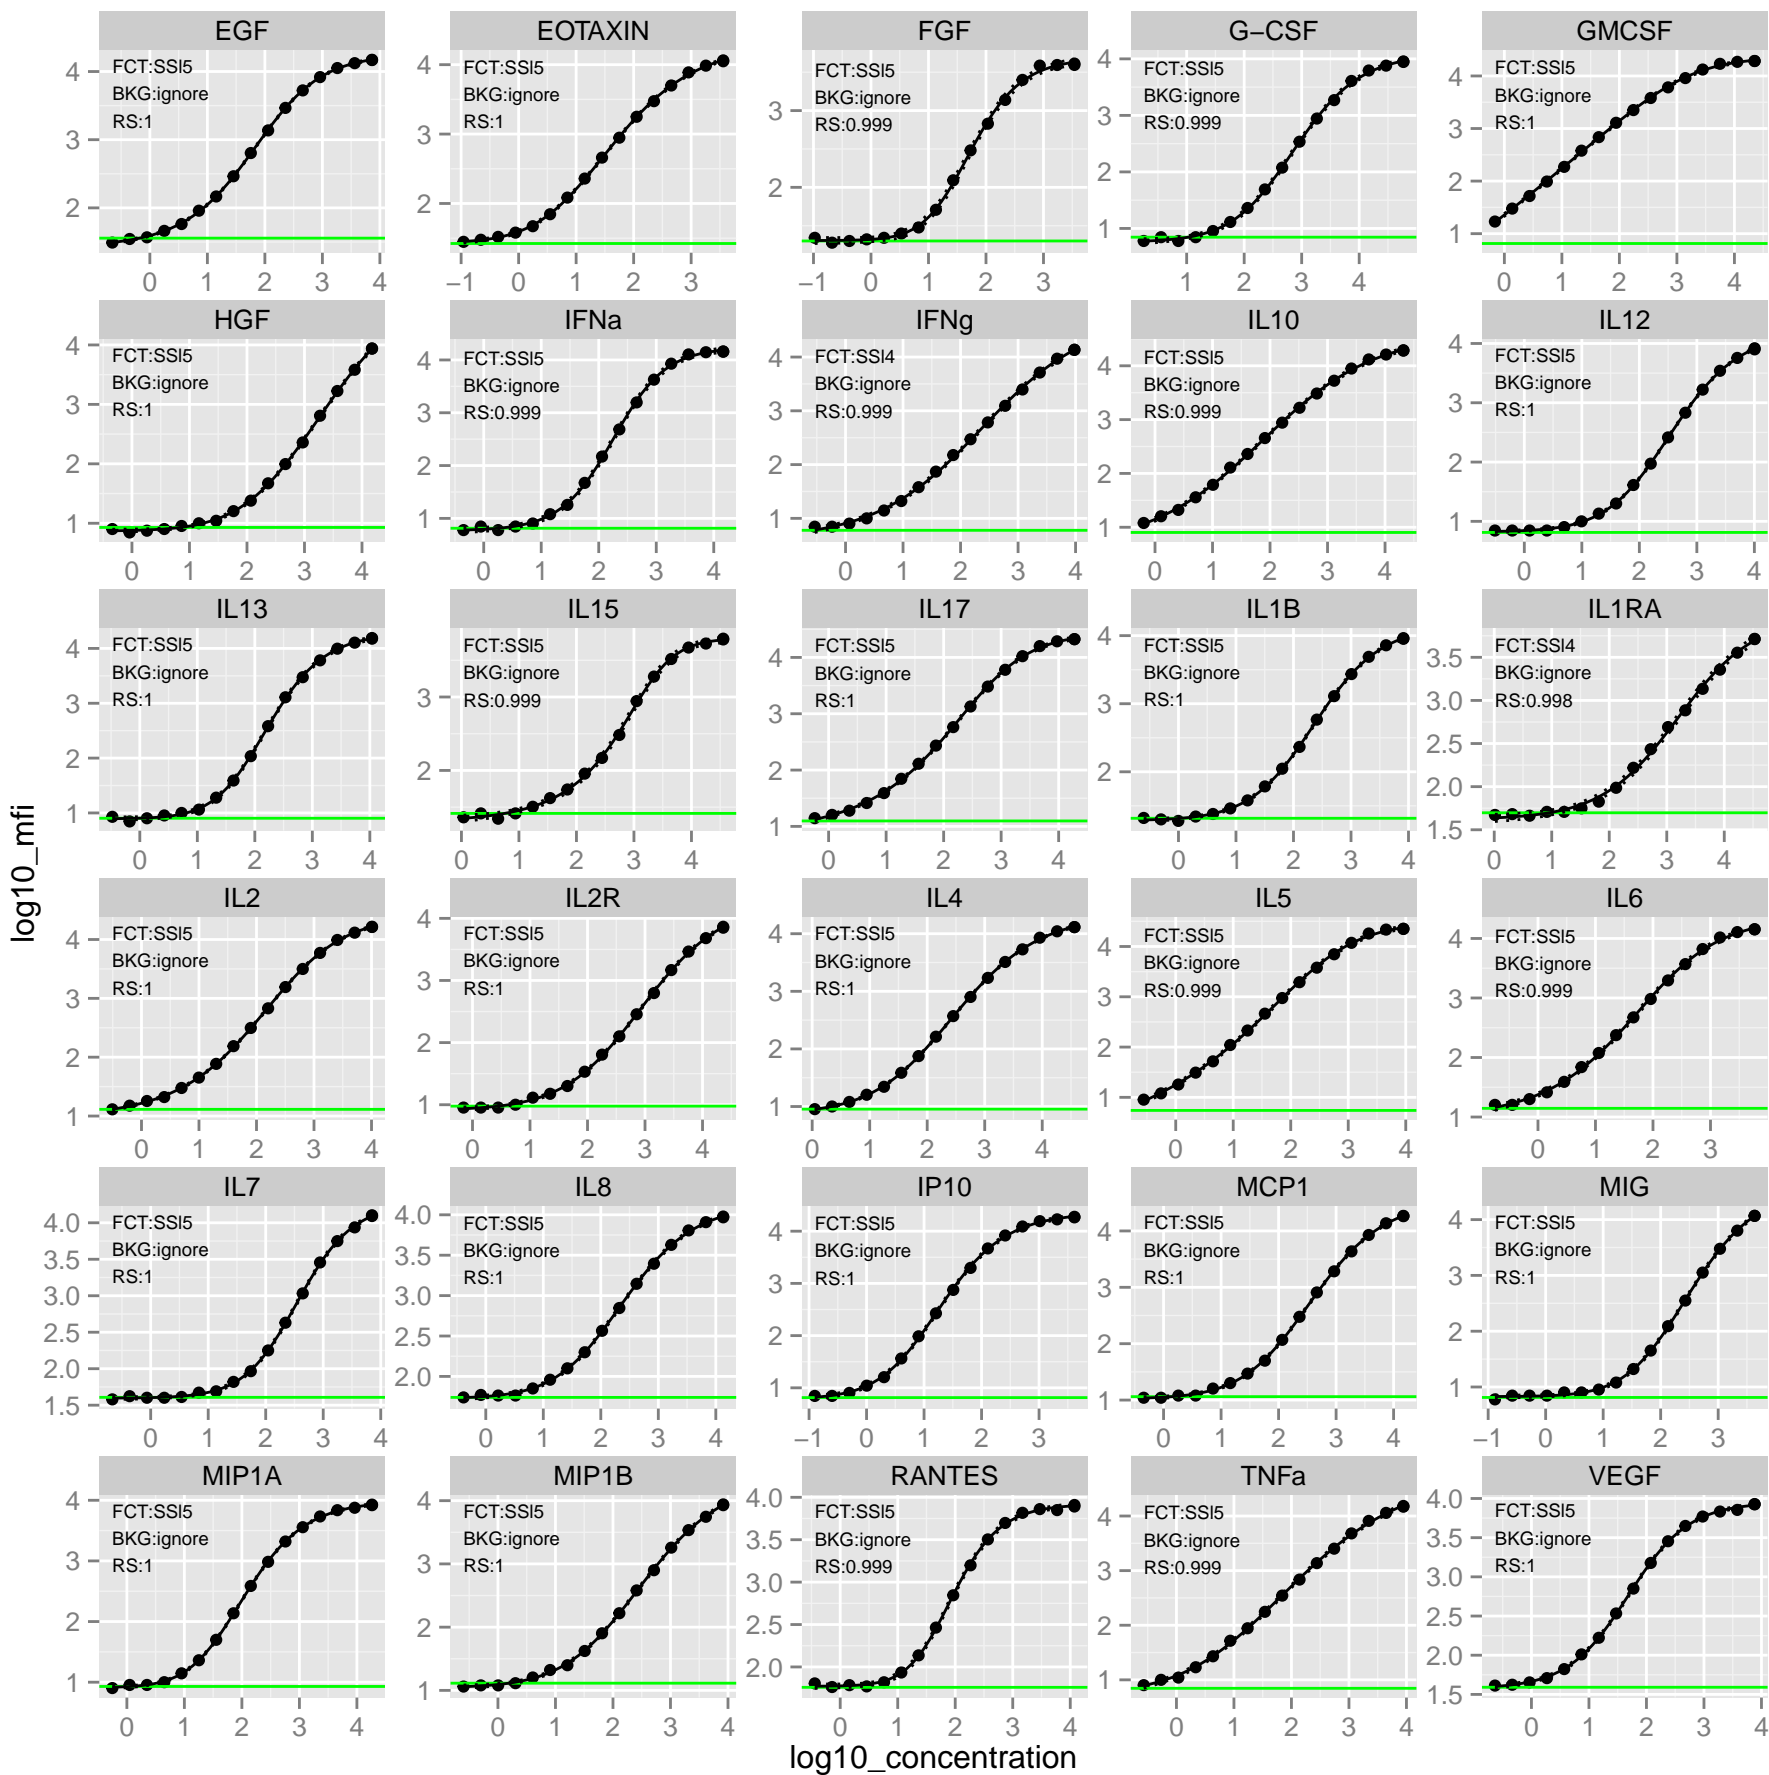

Supplement: Supplementary file 11 [file 1]

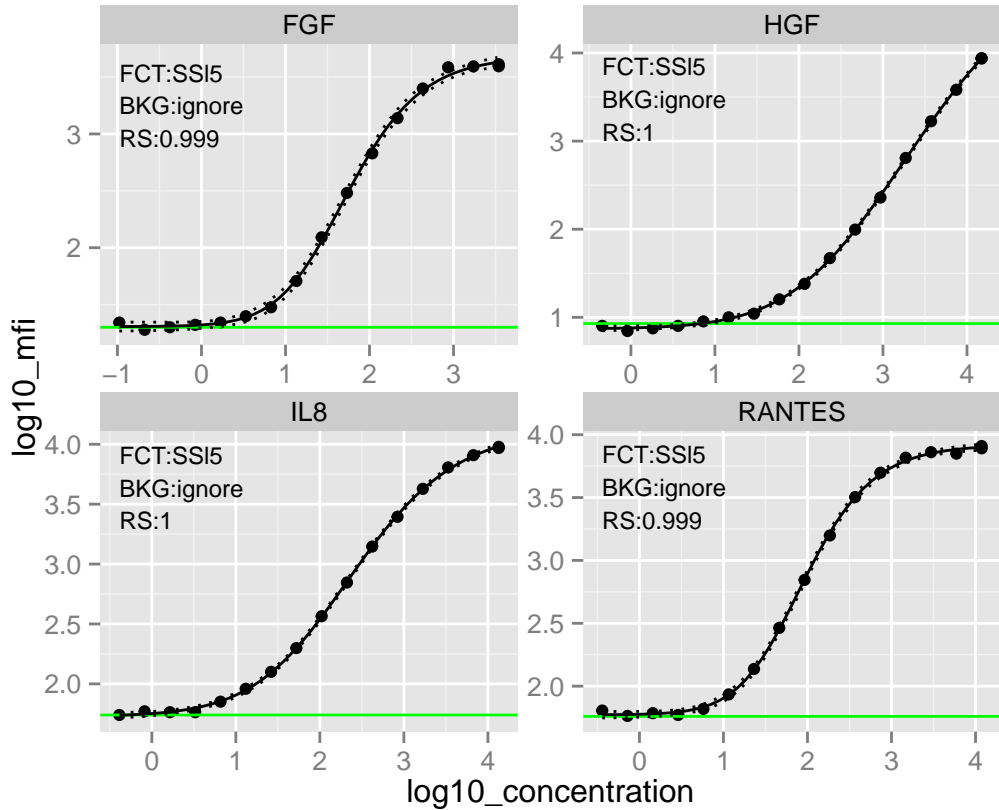

Supplement: Supplementary file 12 [file 1]

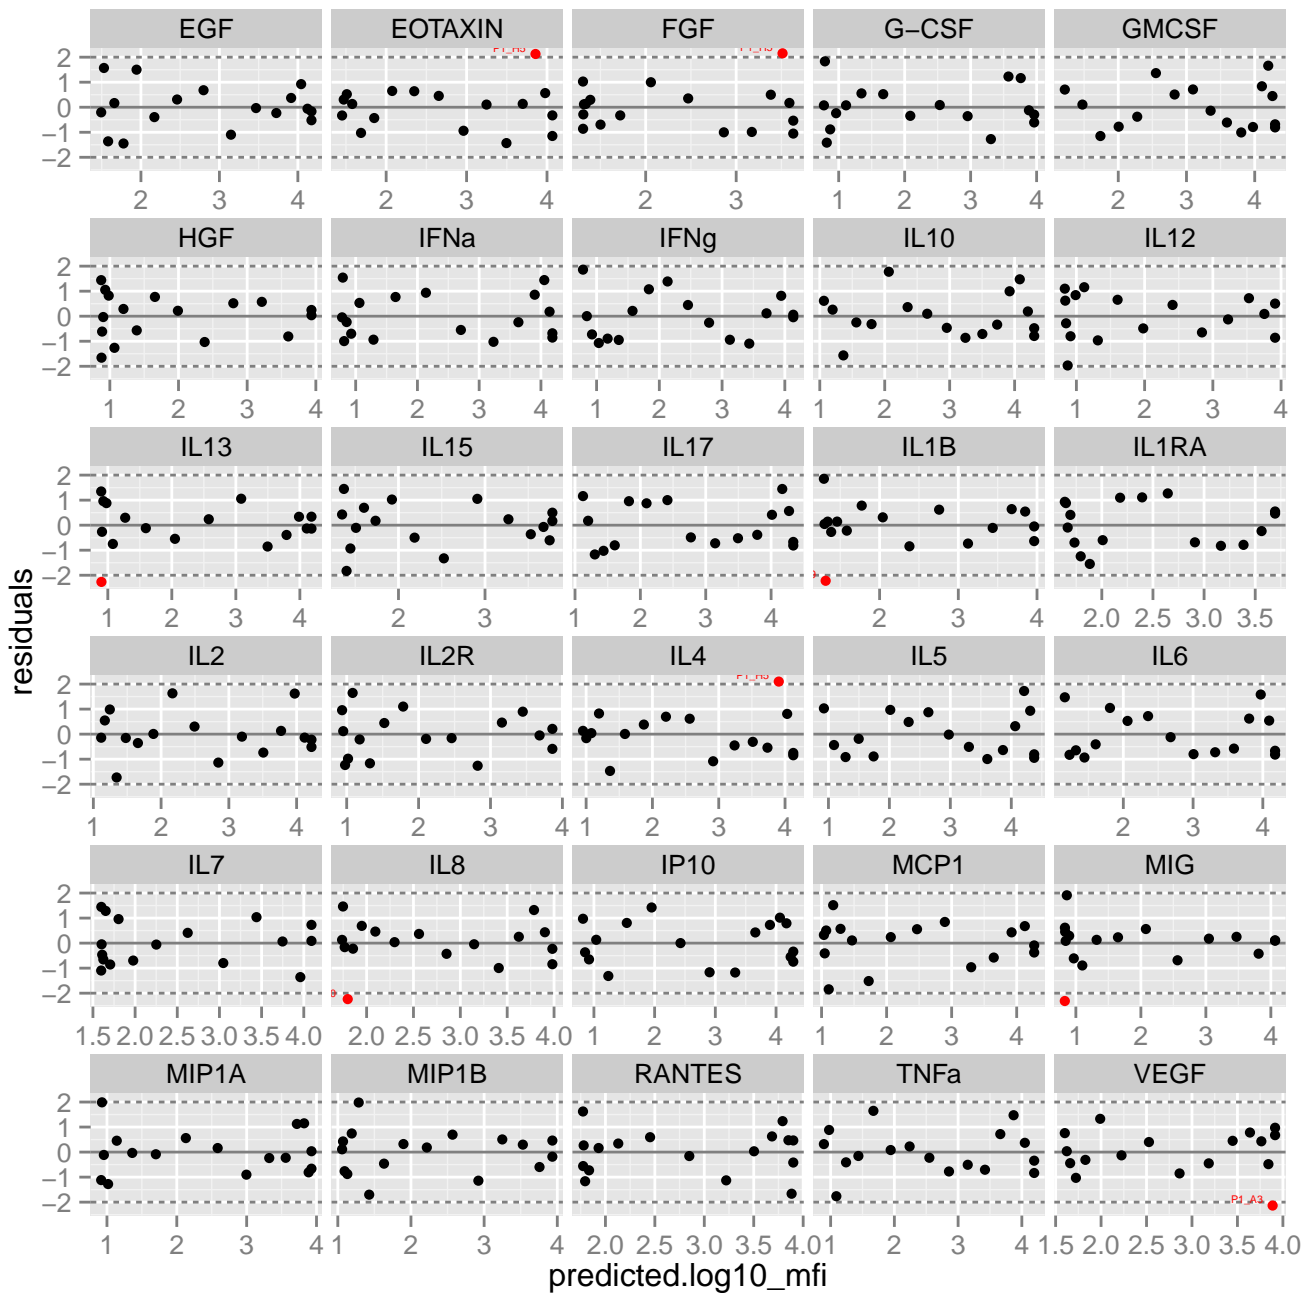

Supplement: Supplementary file 13 [file 1]

# 5 parameter logistic function

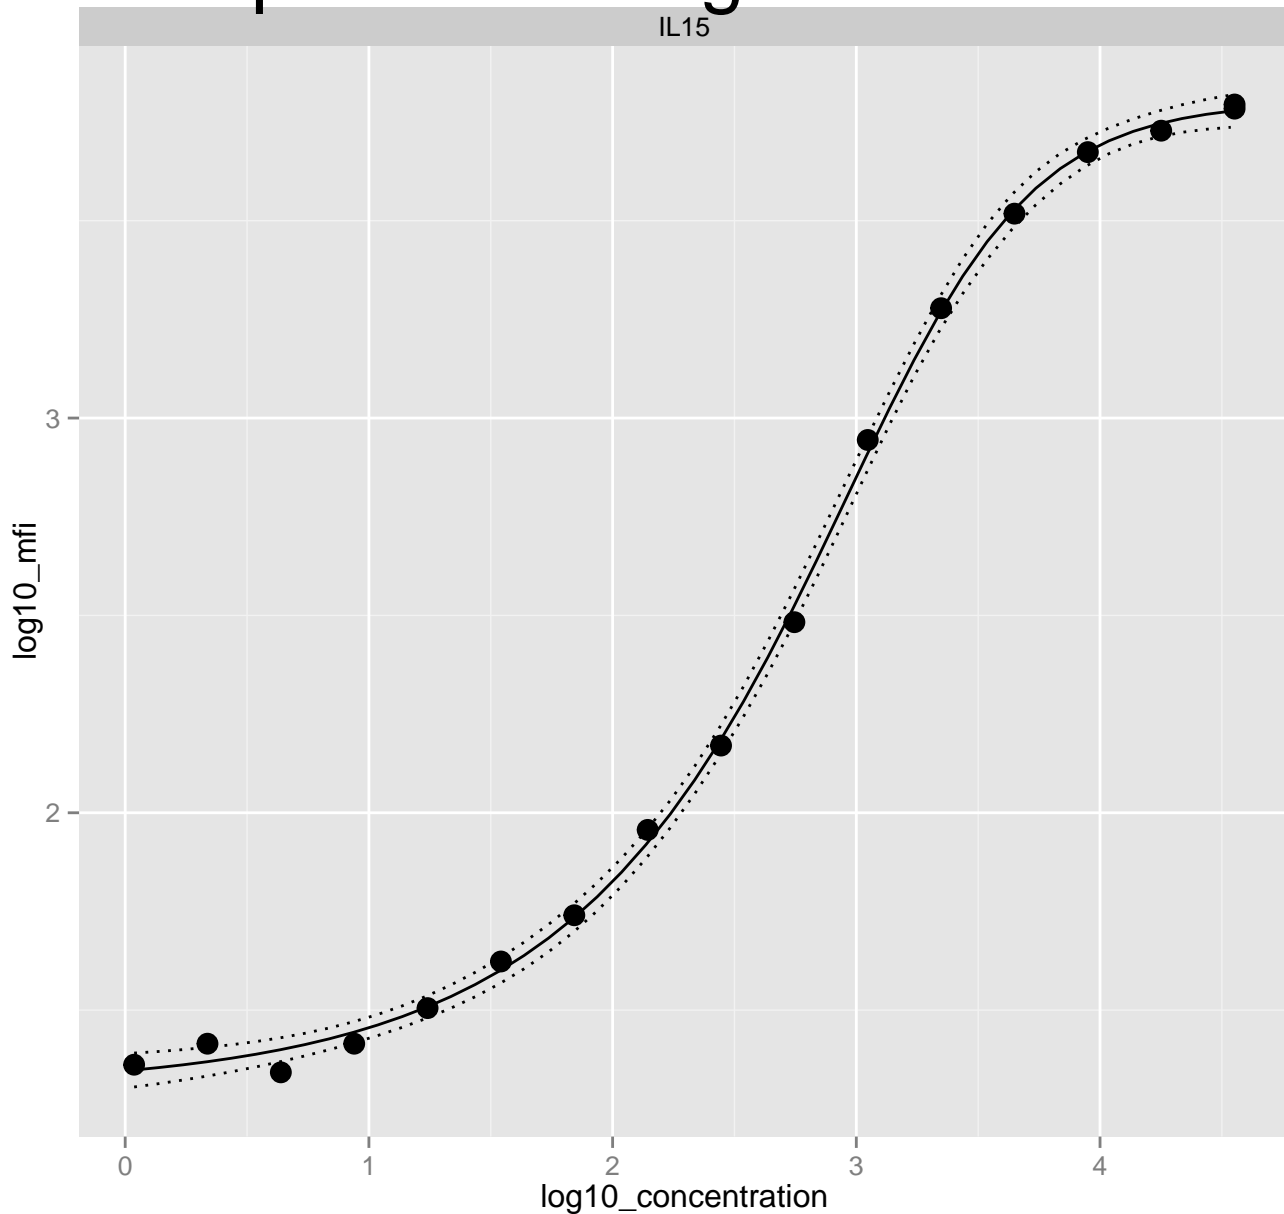

Supplement: Supplementary file 15 [file 1]



Supplement: Supplementary file 16 [file 1]

# 5 parameter logistic function



Supplement: Supplementary file 17 [file 1]



Supplement: Supplementary file 18 [file 1]

# 4 parameter logistic function



Supplement: Supplementary file 19 [file 1]

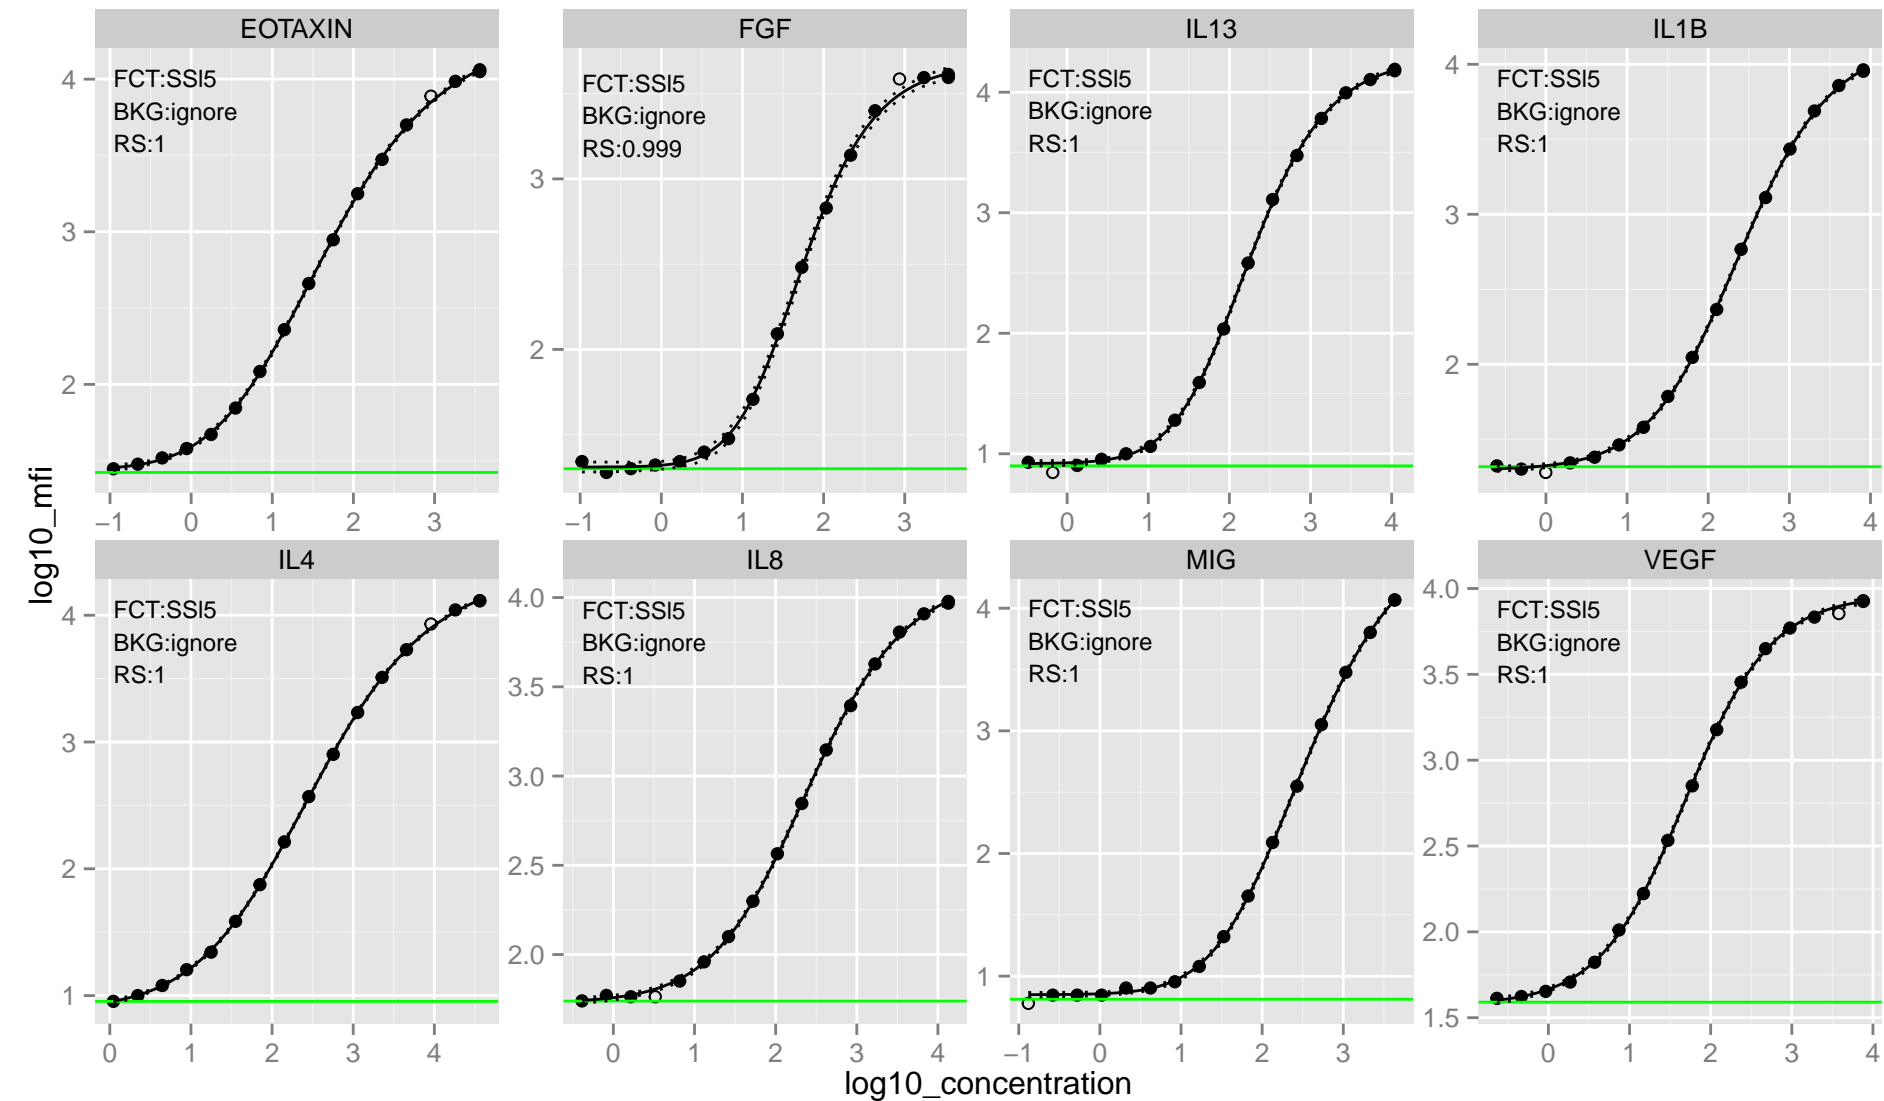

Supplement: Supplementary file 20 [file 1]

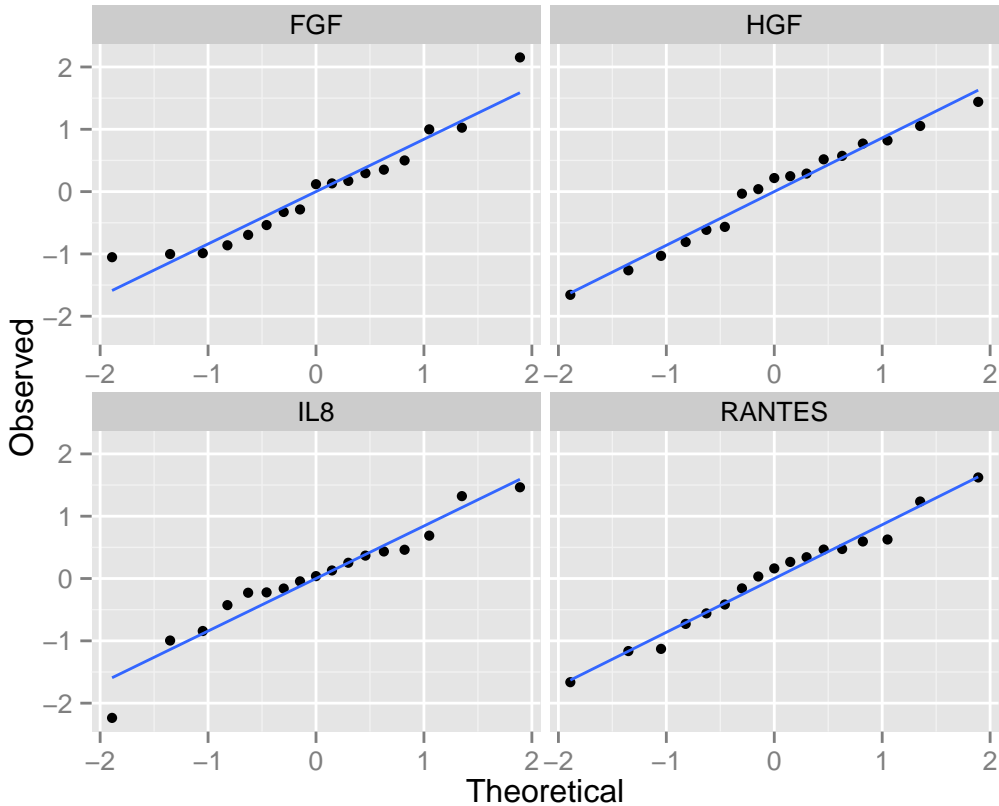

Supplement: Supplementary file 21 [file 1]

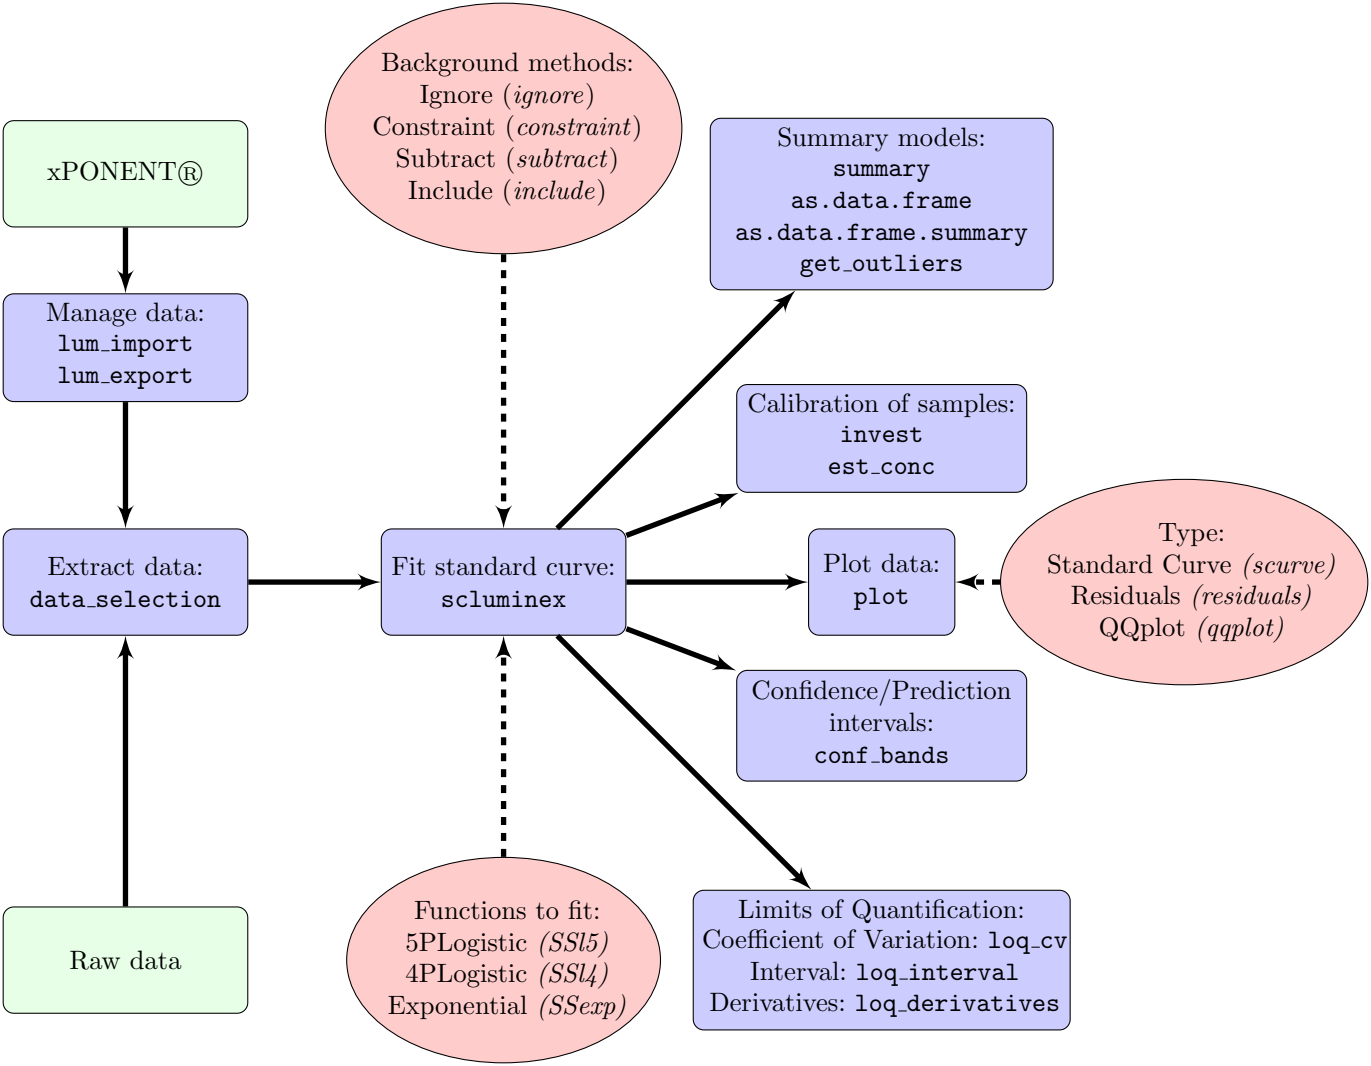

Supplement: Supplementary file 22 [file 1]

- - - Second order derivative  
— Standard Curve

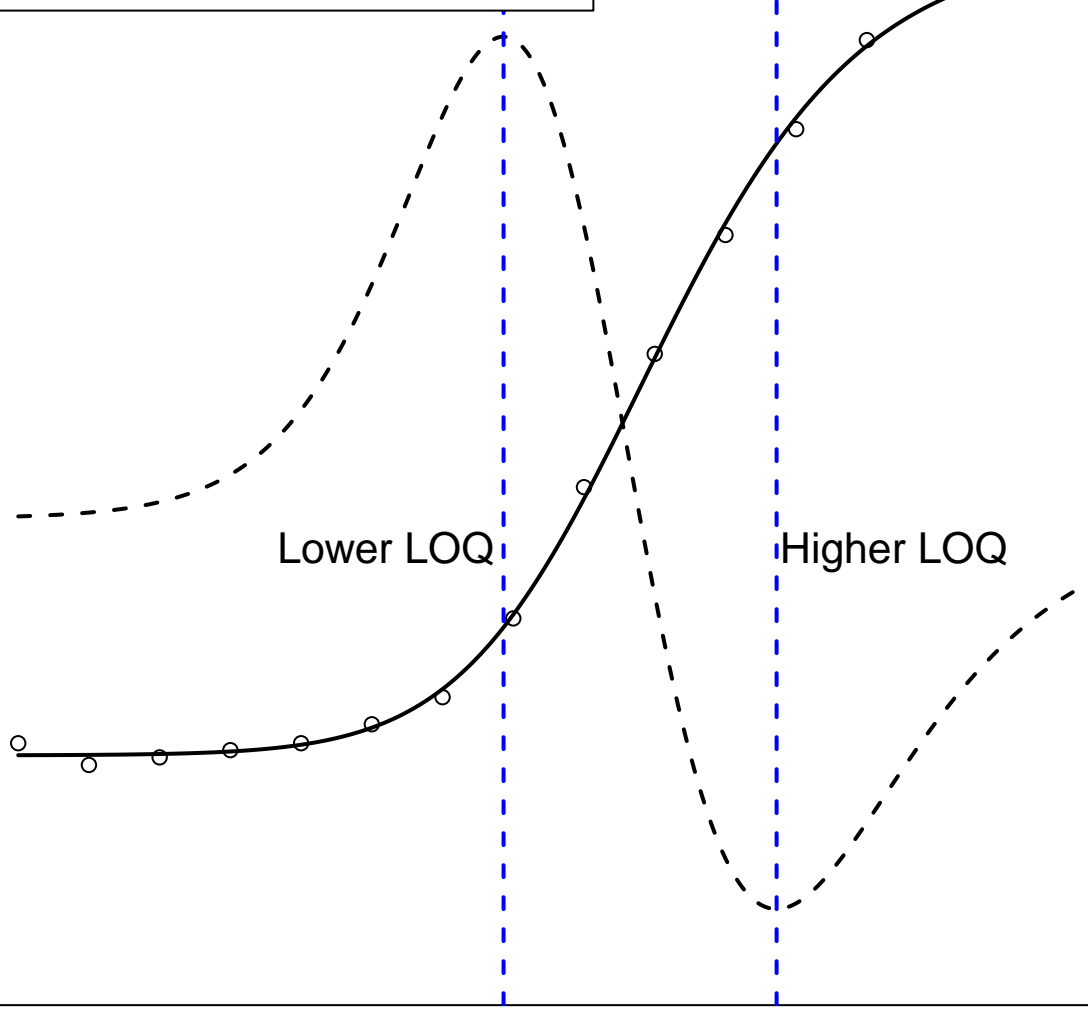

Supplement: Supplementary file 23 [file 1]
